1                   **Pal stabilises the bacterial outer membrane during**  
2                   **constriction by a mobilisation-and-capture mechanism**

3           Joanna Szczepaniak<sup>1,‡</sup>, Peter Holmes<sup>1,¶,‡</sup>, Karthik Rajasekar<sup>1,#,‡</sup>, Renata Kaminska<sup>1</sup>,  
4           Firdaus Samsudin<sup>2</sup>, Patrick George Inns<sup>1</sup>, Patrice Rassam<sup>1,†</sup>, Syma Khalid<sup>2</sup>, Seán M.  
5                                   Murray<sup>3</sup>, Christina Redfield<sup>1</sup> & Colin Kleanthous<sup>1\*</sup>

6           <sup>1</sup>Department of Biochemistry, University of Oxford, Oxford, OX1 3QU, UK

7           <sup>2</sup>Department of Chemistry, University of Southampton, University Road, Southampton,  
8           SO17 1BJ, UK

9           <sup>3</sup>Max Planck Institute for Terrestrial Microbiology and LOEWE Centre for Synthetic  
10           Microbiology (SYNMIKRO), Karl-von-Frisch Strasse 16, 35043 Marburg, Germany

11           <sup>‡</sup>Authors contributed equally to this work

12

13           <sup>¶</sup>Present address: Department of Biochemistry, University of Alberta, Edmonton, Alberta,  
14           T6G 2H7, Canada

15           <sup>#</sup>Present address: Evotec SE, 112-114 Innovation Drive, Milton Park, Abingdon OX14  
16           4RZ, UK

17           <sup>†</sup>Present address: Laboratoire de Bioimagerie et Pathologie, UMR 7021, CNRS,  
18           Université de Strasbourg, Faculté de pharmacie, 74 Route du Rhin, 67401 Illkirch,  
19           France

20

21           <sup>\*</sup>Address for correspondence:

22           Prof Colin Kleanthous, Department of Biochemistry, South Parks Road, University of  
23           Oxford,   Oxford   OX1   3QU,   U.K.   Tel:   +44-1865-613370.   Email:

24           [colin.kleanthous@bioch.ox.ac.uk](mailto:colin.kleanthous@bioch.ox.ac.uk)

## 25 **Summary**

26 Coordination of outer membrane constriction with septation is critical to faithful division  
27 in Gram-negative bacteria and vital to the barrier function of the membrane. Recent  
28 studies suggest this coordination is through the active accumulation of the  
29 peptidoglycan-binding outer membrane lipoprotein Pal at division sites by the Tol  
30 system, but the mechanism is unknown. Here, we show that Pal accumulation at  
31 *Escherichia coli* division sites is a consequence of three key functions of the Tol system.  
32 First, Tol mobilises Pal molecules in dividing cells, which otherwise diffuse very slowly  
33 due to their binding of the cell wall. Second, Tol actively captures mobilised Pal  
34 molecules and deposits them at the division septum. Third, the active capture  
35 mechanism is analogous to that used by the inner membrane protein TonB to dislodge  
36 the plug domains of outer membrane TonB-dependent nutrient transporters. We  
37 conclude that outer membrane constriction is coordinated with cell division by active  
38 mobilisation-and-capture of Pal at division septa by the Tol system.

39

40 Word count, 160

41

42

43

44

45

46

47

## 48 **Introduction**

49 Cell division in Gram-negative bacteria is orchestrated by the FtsZ ring that  
50 localises to mid-cell and establishes a multiprotein divisome complex<sup>1</sup>. Cycles of septal  
51 peptidoglycan synthesis/hydrolysis by the divisome and FtsZ treadmilling drive  
52 constriction of the entire cell envelope<sup>2</sup>. While much is known about the components  
53 that constrict the inner membrane and remodel the cell wall during cell division relatively  
54 little is known about how the outer membrane (OM) is invaginated<sup>3</sup>. The OM is essential  
55 in most Gram-negative bacteria<sup>4,5</sup>; where it serves as both a permeability barrier to  
56 exclude hydrophobic and hydrophilic compounds, including antibiotics such as  
57 vancomycin<sup>6</sup>, and contributes to the mechanical stiffness of the cell<sup>4</sup>. The OM is not  
58 energised and there is no ATP in the periplasm so active processes at the OM must be  
59 coupled either to ATP hydrolysis in the cytoplasm or the proton motive force (PMF)  
60 across the inner membrane<sup>7-9</sup>. Recently, Petiti et al have suggested that the  
61 multiprotein Tol system (also known as Tol-Pal) constricts the OM by populating the  
62 division septum with Pal<sup>10</sup>. However, no mechanism has been proposed. In the present  
63 work, through a combination of *in vivo* imaging, deletion analysis and mutagenesis,  
64 structure determination, biophysical measurements, mathematical modelling and  
65 molecular dynamics simulations, we demonstrate that the PMF is exploited by the Tol  
66 system to both mobilise Pal in the OM of dividing cells and to then capture these  
67 mobilised molecules at division sites. Mobilisation-and-capture circumvents Pal's  
68 intrinsically low mobility in the OM and results in its accumulation at division sites, where  
69 it invaginates the OM through non-covalent interactions with newly-formed septal  
70 peptidoglycan.

71 *tol* genes, which are found in most Gram-negative bacteria, were originally  
72 identified by Luria and co-workers in the 1960s through mutations that engendered  
73 *Escherichia coli* tolerance towards colicins and filamentous bacteriophages<sup>11</sup>.  
74 Concomittant with this tolerance is a pleiotropic OM instability phenotype that is manifest  
75 through cell filamentation and division defects, hypersensitivity towards detergents and  
76 bile salts and leakage of periplasmic contents. The Tol assembly is essential in bacteria  
77 expressing O-antigens, is a virulence factor in host-pathogen interactions<sup>12-14</sup> and is  
78 implicated in biofilm formation<sup>15</sup>. The core components of Tol are three IM proteins,  
79 TolQ, TolR and TolA, periplasmic TolB and peptidoglycan associated lipoprotein Pal in  
80 the inner leaflet of the OM (**Figure 1a**)<sup>3</sup>. TolA in the inner membrane spans the  
81 periplasm and undergoes PMF-driven conformational changes by virtue of its interaction  
82 partners TolQ and TolR, which are homologues of the MotA and MotB stator proteins  
83 that drive rotation of the bacterial flagellum (**Supplementary Figure 1**)<sup>16</sup>. Pal binds the  
84 *meso*-diaminopimelate (mDAP) sidechain of stem peptides within the peptidoglycan  
85 layer<sup>17</sup>, but this non-covalent contact is blocked by TolB which binds Pal with high  
86 affinity and occludes the mDAP binding site<sup>18</sup>.

87 The pleiotropic phenotypes of *tol* mutants have obscured past efforts to define the  
88 role of Tol in the cell envelope, explaining why several functions have previously been  
89 ascribed to this trans-envelope assembly<sup>19,20</sup>. Through a multidisciplinary approach, we  
90 now define the molecular mode of action of Tol. We show that during cell division the  
91 Tol assembly exploits the PMF to mobilise Pal molecules from around the cell while  
92 simultaneously capturing them at the divisome in order to stabilise the OM.

93

94

95 **Results**

96

97 **The Tol system causes a ~50% increase in Pal molecules at the divisome**

98       The recruitment of Tol components to the divisome<sup>21</sup> in conjunction with the PMF  
99 concentrates Pal at the septum (**Supplementary Figures 2 and 3**)<sup>10</sup>. However, it has  
100 not been established what proportion of Pal molecules in the cell are mobilised for OM  
101 stabilisation at division sites. To determine quantitatively the number of Pal molecules  
102 this represents and probe their diffusion characteristics, we followed the mobility of Pal  
103 fused to photoactivatable mCherry (Pal-PAmCherry) in *E. coli* by fluorescence  
104 microscopy (**Figures 1b**). Single particle tracking (SPT) experiments revealed that on  
105 short time-scales (~350 ms), the mobility of Pal-PAmCherry in both dividing and non-  
106 dividing cells is slow and highly restricted (median apparent diffusion coefficient, ~0.004  
107  $\mu\text{m}^2\text{s}^{-1}$ , median confinement radius, ~82 nm). Slow Pal diffusion was attributed to cell  
108 wall binding since removal of the peptidoglycan-binding domain (lipoylated-PAmCherry)  
109 resulted in faster diffusion in the OM (**Figure 1c**). Our experiments show that Pal-  
110 PAmCherry molecules are distributed randomly in non-dividing cells but redistribute with  
111 the onset of division; in non-dividing cells, ~27% of Pal molecules are located at mid-cell  
112 whereas in dividing cells ~37% of Pal molecules are located at mid-cell. We conclude  
113 that notwithstanding Pal's slow mobility in the OM the onset of division results in a ~50%  
114 increase in the number of Pal molecules at the divisome. We set out to determine the  
115 mechanism by which this global mobilisation and septal localisation of Pal occurs during  
116 cell division.

117

118

119 **Mobilisation-and-capture of Pal underpins its active deposition at division sites**

120 Suspecting the mobility of Pal in the OM must be even slower than that detected  
121 by SPT, we conducted fluorescence recovery after photobleaching (FRAP) experiments  
122 on *E. coli* cells expressing Pal-mCherry. We found that in non-dividing cells ~60% of the  
123 initial fluorescence at mid-cell recovered over a ten-minute time-course which increased  
124 to ~80% in the septa of dividing cells (**Figure 2a**). The very slow nature of this diffusion  
125 raised concerns that protein biogenesis and even reactivation of bleached fluorophores  
126 could be contributing to the recovery of fluorescence after photobleaching. Control  
127 experiments however indicated that these contributions were relatively minor  
128 (**Supplementary Figure 4**). The acceleration in Pal diffusion evident during division  
129 required an intact Tol assembly since deletion of TolA or a mutant TolB that is unable to  
130 bind to Pal (TolB H246A T292A)<sup>22</sup> both abolish this effect (**Figures 2b and c,**  
131 **respectively**). We conclude that Pal diffuses very slowly in the OM, on a timescale  
132 similar to the elongation rate of an *E. coli* cell at 37°C.

133 To gain greater insight into the slow mobility of Pal and its dependence on the  
134 other components of the Tol system we analysed the recovery FRAP curves across the  
135 longitudinal axis of wild-type and mutant cells. The data in **Figures 3a and b** show that  
136 a significant fraction of photobleached Pal fluorescence re-emerges at the septum of  
137 dividing cells after 10 min whereas the same is not the case of the mid-cell position in  
138 non-dividing cells. Moreover, this recovery of septal Pal fluorescence is dependent on  
139 TolA, TolA coupling to the PMF and TolB binding to Pal (**Figures 3c-e, respectively**).  
140 We conclude that the slow accumulation of Pal at division sites requires the TolQ-TolR-  
141 TolA IM complex, coupling of the complex to the PMF and TolB.

142

143           The very slow recovery of Pal-mCherry fluorescence indicated that we would not  
144 be able to extract diffusion or binding rates using standard FRAP analysis because cells  
145 are growing and dividing over the same timescale of diffusion, plus the abundance of  
146 Pal-mCherry at mid-cell changes as division progresses (**Figure 1**). We therefore  
147 developed a mathematical method to extract effective diffusion coefficients ( $D_{eff}$ ). This  
148 method is based on fitting experimental kymographs to numerically simulated  
149 kymographs in order to take account of both temporal and spatial information (see  
150 **Methods** and **Supplementary Figure 5**).  $D_{eff}$  essentially reflects the proportion of  
151 mobile Pal molecules in a cell at any given spatial position and at any given time. We  
152 used this method to determine  $D_{eff}$  in individual dividing and non-dividing cells (**Figure**  
153 **3f**).  $D_{eff}$  in both cell types was found to be very small (on the order of  $10^{-4} \mu\text{m}^2\text{s}^{-1}$ ), but  
154 approximately two-to-three times higher in dividing cells ( $7 \times 10^{-4} \mu\text{m}^2\text{s}^{-1}$  versus  $3 \times 10^{-4}$   
155  $\mu\text{m}^2\text{s}^{-1}$ ).

156           We examined this difference in more detail by looking at how  $D_{eff}$  varies across  
157 the length of the cell (**Figure 3g**). We found that  $D_{eff}$  in non-dividing cells was constant  
158 across the length of the cell but that dividing cells were characterised by a drop in  $D_{eff}$   
159 from about  $8 \times 10^{-4} \mu\text{m}^2\text{s}^{-1}$  away from the septum to a value similar to that of non-  
160 dividing cells,  $\sim 4 \times 10^{-4} \mu\text{m}^2\text{s}^{-1}$ , at the septum (**Figure 3g**). We also obtained  $D_{eff}$  for  
161 TolB H246A T292A and the *tolA* deletion strains to determine the contribution of the  
162 intact Tol-Pal assembly to this diffusion profile in both dividing and non-dividing cells.  
163 Both genetic backgrounds exhibited Pal-mCherry  $D_{eff}$  profiles essentially identical to  
164 those of non-dividing cells (**Supplementary Figure 5**). These FRAP data reaffirm the  
165 very slow diffusion of Pal in non-dividing cells, which, as shown above, is dominated by  
166 associations with the cell wall. Yet, remarkably, with the onset of division and

167 localisation of the TolQ-TolR-TolA inner membrane complex to the divisome, Pal  
168 diffusion increases throughout the cell except at the septum where instead Pal diffusion  
169 is similar to that in non-dividing cells. Blocking TolB binding to Pal or removing PMF-  
170 linked TolA abolished both the enhancement in  $D_{eff}$  and the accumulation of Pal at the  
171 septum. In conclusion, Pal mobility at division sites involves two distinct states; a septal  
172 state similar to that of a non-dividing cell in which diffusion is dominated by  
173 peptidoglycan binding, and, an alternate state, away from the division site where Pal  
174 mobility is enhanced. We next sought to determine what interactions within the Tol  
175 assembly could be responsible for generating these states.

176

### 177 **Structure of the TolA-TolB complex**

178 Previous studies have shown that *E. coli* TolB interacts with both TolA and Pal  
179 whereas TolA only interacts with TolB (**Figure 1a**). The disordered N-terminal twelve  
180 residues of TolB constitute the TolA binding site ( $K_d \sim 40 \mu\text{M}$  for the *E. coli* complex)  
181 since deletion of these residues abolishes TolA binding and results in a *tol* phenotype<sup>18</sup>.  
182 In the present work, we found that this deletion also abolished Pal-mCherry  
183 accumulation at division sites (**Figure 4a**), demonstrating that the TolA-TolB complex is  
184 indeed essential for Pal deposition at septa.

185 To understand the structural importance of this complex we determined the  
186 solution state structure of the C-terminal domain of TolA bound to the N-terminus of  
187 TolB in the form of a peptide. Due to poor spectral resolution of the *E. coli* complex,  
188 however, we switched to the equivalent 12-kDa complex from *P. aeruginosa*  
189 (**Supplementary Figure 6**). The structure of the *P. aeruginosa* TolA-TolB complex  
190 showed close structural similarity (2.2 Å rmsd) to complexes of *E. coli* TonB bound to the



191 seven-residue TonB box sequence of TonB dependent transporters (TBDTs) (**Figures 4**  
192 **b and c; Supplementary Table 1**). TonB is an inner membrane protein that extends  
193 through the periplasm so its C-terminal domain can activate import of iron siderophore  
194 complexes and vitamins through the plug domains that occlude TBDTs in the OM  
195 (**Supplementary Figure 1**). The C-terminal domains of TonB and TolA share little  
196 sequence identity (<20%) but are structural homologues<sup>23</sup>. TolA-TolB and TonB-TBDT  
197 complexes are both formed by parallel  $\beta$ -strand augmentation in which a C-terminal  
198 element of secondary structure (a  $\beta$ -strand in TonB, an  $\alpha$ -helix in TolA) is displaced in  
199 order to expose a peptidic binding site (**Figure 4d**). In both cases, complexes of low  
200 affinity result, typically with equilibrium dissociation constants ( $K_d$ ) of 40-250  $\mu$ M  
201 (**Supplementary Figure 6**)<sup>24</sup>.

202 The TolA-TolB complex buries 1519  $\text{\AA}^2$  accessible surface area, involves nine  
203 TolB amino acids and is stabilized by several hydrophobic interactions. The side-chains  
204 of three TolB amino acids, Leu25, Val26, Ile27, at the centre of the binding site replace  
205 hydrophobic contacts lost from the core of TolA as a result of its C-terminal  $\alpha$ -helix being  
206 displaced (**Figure 4c**). Displacement of this  $\alpha$ -helix accounts for the slow association  
207 rate of the complex and for the slow chemical exchange dynamics evident in solution  
208 NMR experiments (**Supplementary Figures 6b and c and Supplementary Figures 7**  
209 **a-c**). The importance of the stabilising hydrophobic contacts was demonstrated through  
210 single and multiple alanine substitutions all of which yielded *tol* phenotypes *in vivo* when  
211 mutated in *E. coli* TolB (equivalent residues Ile25, Val26, Ile27) and abolished *P.*  
212 *aeruginosa* TolB binding to TolA *in vitro* (**Supplementary Figures 7 d, e**). Moreover,  
213 TolB alanine mutations at these hydrophobic residues blocked Pal-mCherry  
214 accumulation at *E. coli* division sites (**Figure 4e**), but left TolA localisation unaffected

215 **(Supplementary Figure 7f)**. In conclusion, our data show that the same  $\beta$ -strand  
216 augmentation mechanism underpins formation of TolA-TolB and TonB-TBDT  
217 complexes.

218

219 **Steered molecular dynamics simulations suggest the TolB-Pal complex is force-**  
220 **labile**

221 TonB-TBDT complexes convert the PMF into a mechanical force that displaces  
222 the plug domains of TBDTs in the OM<sup>25</sup>. It is reasonable to assume that TolA-TolB also  
223 transduces the force of the PMF into mechanical force. We postulate that this force is  
224 used to dissociate the TolB-Pal complex at the OM, releasing TolB to be recycled so  
225 that more Pal molecules can be mobilised for relocation to the division site. We next  
226 addressed the question of whether TolB-Pal complexes are susceptible to the  
227 application of force. We conducted steered molecular dynamics (MD) simulations in  
228 which *E. coli* TolB was pulled away from lipoylated Pal embedded in a membrane.

229 **(Supplementary Figures 8 a-c)**. An important consideration in these simulations was  
230 the structural state of TolB's N-terminus, the TolA binding site. In the unbound state the  
231 TolB N-terminus is disordered, which favours TolA binding<sup>18,26</sup>. When Pal binds, large-  
232 scale conformational changes are induced in TolB that sequester its N-terminus  
233 between its two constituent domains and diminish TolA binding. Nevertheless, TolB-Pal  
234 can still interact with TolA to form a ternary (TolA-TolB-Pal) complex<sup>18</sup>, indicative of the  
235 N-terminal sequence of TolB becoming dislodged. We therefore conducted simulations  
236 on the TolB-Pal complex in which the N-terminus was either bound to TolB or dislodged  
237 as would be necessary if TolA were to exert force on the complex. The simulations  
238 revealed that the application of force to the complex induced a conformational change

239 that caused dissociation of Pal from the C-terminal  $\beta$ -propeller domain of TolB.  
240 Moreover, the pull-force required to dissociate the TolB-Pal complex was greater when  
241 the N-terminus of TolB remained bound to the body of TolB. The simulations identified a  
242 network of inter-domain hydrogen bonds involving TolB His146, Asp150 and Thr165 that  
243 appeared to link force to the dissociation of Pal in the simulations. The importance of  
244 these conserved TolB residues to the functioning of the system *in vivo* was evaluated by  
245 alanine mutations all of which yielded *tol* phenotypes (**Supplementary Figure 8 d and**  
246 **e**). Hence, our MD simulations supported by mutational data are consistent with the  
247 involvement of force in the release of Pal from TolB-Pal complexes. In the Discussion,  
248 we provide a model for how force-mediated dissociation of the TolB-Pal complex at the  
249 OM by TolA could be used to mobilise more Pal molecules for relocation to the division  
250 site.

251

252

## 253 Discussion

254 The main role of the Tol assembly in Gram-negative bacteria is to concentrate the  
255 lipoprotein Pal at the divisome in order to bind the underlying peptidoglycan and  
256 invaginate the OM<sup>10,21</sup>. The present work demonstrates that a significant fraction of  
257 cellular Pal molecules become localised at the divisome to achieve this invagination and  
258 lays out the basic mechanics by which the Tol assembly coordinates Pal localisation.  
259 An important consideration in understanding how the Tol assembly functions are the  
260 significant copy number differences of the individual proteins. Quantitative proteomics  
261 studies estimate ~60,000 copies of Pal in the OM of *E. coli* when grown in rich media,  
262 ~6,000 copies of TolB and 500-2,000 copies of the IM components TolA, TolQ and  
263 TolR<sup>27</sup>. The number of TolB molecules within the periplasm equates to a concentration  
264 of ~60  $\mu\text{M}$ , which, given its high affinity for Pal ( $K_d \sim 30 \text{ nM}$ ), means that all TolB  
265 molecules will be in complex with Pal unless prevented from doing so. The affinity of  
266 Pal for peptidoglycan has not been reported but this is likely to be  $\mu\text{M}$  based on  
267 measurements of the affinity of the Pal-like domain of OmpA for peptidoglycan<sup>28</sup>. Below  
268 we integrate these copy number differences with our experimental data into a unifying  
269 model that explains how Tol exploits the PMF to cause Pal accumulation at division sites  
270 (**Figure 5**). We first outline additional information and assumptions upon which this  
271 model is based.

272 First, we propose that the primary role of the PMF-coupled inner membrane  
273 complex of TolQ-TolR-TolA is to dissociate TolB-Pal at the OM by a process similar to  
274 that used by ExbB-ExbD-TonB to displace the plug domains of TBDTs<sup>29</sup>  
275 (**Supplementary Figure 1**). The PMF coupling mechanisms of the Ton and Tol  
276 machines in the inner membrane are known to be equivalent; indeed, deletion mutants

277 in one can be partially complemented by the other<sup>19</sup>. The present work demonstrates  
278 that the mechanical force generated by the PMF is transduced to the OM through  
279 structurally equivalent complexes, TonB-TBDT and TolA-TolB, respectively (**Figure 4d**).  
280 Whereas TonB removes a soluble domain from within a TBDT, TolA removes a soluble  
281 protein, TolB, from its complex with Pal, most likely via a ternary TolA-TolB-Pal  
282 complex<sup>18</sup>. Our MD simulations, in conjunction with mutagenesis data, are consistent  
283 with the TolB-Pal complex being amenable to force-mediated dissociation. It has yet to  
284 be demonstrated however that PMF-coupled TolA *in vivo* can mechanically dissociate  
285 TolB-Pal complexes.

286         Second, Pal exists as two populations, a relatively immobile population bound to  
287 peptidoglycan and a smaller more mobile population bound to TolB. While we have not  
288 been able to detect the mobility of individual TolB-Pal molecules in dividing cells, our  
289 analysis indicates that at the population level the fraction of mobile Pal away from the  
290 septum (leading to a higher  $D_{eff}$ ) is greater than in non-dividing cells (**Figure 3g**). This  
291 implies that the concentration of mobile TolB-Pal complexes is also higher away from  
292 the septum in dividing versus non-dividing cells. Yet, TolB accumulates at the septum in  
293 dividing cells<sup>10</sup>. To resolve this apparent contradiction and explain the differential  
294 mobility of Pal we further propose that: (1) TolQ-TolR-TolA ‘pulls’ TolB through holes in  
295 the peptidoglycan layer<sup>30</sup>, from the ‘outer’ region of the periplasm close to the OM to the  
296 ‘inner’ periplasm thereby spatially separating TolB from Pal in the process. Precedent  
297 for such a trans-envelope pulling mechanism can be found in the TBDT literature.  
298 Transcription of TBDT genes is often activated by the cognate ligand binding to the  
299 TBDT in the OM, which relays a signal to the IM in a TonB-dependent manner<sup>25</sup>; (2)  
300 TolA-independent dissociation of the TolB-Pal complex is slow compared to the

301 timescale of its diffusion, which is a reasonable assumption given that the half-life for  
302 dissociation of the TolB-Pal complex *in vitro* is ~2 min<sup>31</sup>. We now consider how the Tol  
303 system works in non-dividing and dividing cells (**Figure 5**).

304 In non-dividing cells (**Figure 5a**), TolQ-TolR-TolA in the inner membrane exhibits  
305 unrestricted Brownian motion<sup>32</sup>. We postulate that in this diffusive mode, and via  
306 coupling to the PMF, TolA continuously scans the OM for TolB-Pal complexes on which  
307 to pull. If a TolB-Pal complex is captured by circulating TolQ-TolR-TolA then TolB is  
308 pulled from the outer to the inner periplasm thereby releasing Pal to bind peptidoglycan.  
309 TolB returns to the outer periplasm by eventually diffusing through holes in the  
310 peptidoglycan. Since TolB is actively translocated by TolQ-TolR-TolA in one direction  
311 this will bias TolB to the inner periplasm. Our data suggest that in non-dividing cells this  
312 is the default position since the TolB H246A T292A mutant, which is unable to bind Pal,  
313 has no impact on Pal mobility (**Supplementary Figure 5c**). Paradoxically then the PMF  
314 has the effect of *slowing* Pal mobility in non-dividing cells by ensuring Pal is always  
315 bound to peptidoglycan. Our data suggest that in non-dividing cells the small number of  
316 TolB molecules relative to Pal (~10%) that could enhance Pal mobility in the OM are  
317 prevented from doing so because TolQ-TolR-TolA continually sequesters TolB to the  
318 inner periplasm.

319 In dividing cells (**Figure 5b**), the TolQ-TolR-TolA assembly is recruited to the  
320 divisome<sup>21,32</sup>. An important consequence of this spatial localisation is that the assembly  
321 is now no longer available to dissociate TolB-Pal complexes anywhere other than the  
322 divisome. Hence, a TolB-Pal complex must diffuse further to interact with TolA, which  
323 could be half a cell-length away. This has the effect of reducing the translocation of  
324 TolB molecules from the outer-to-inner periplasm in dividing relative to non-dividing cells

325 and therefore the abundance of TolB in the outer periplasm increases. This explains the  
326 observed differences in  $D_{eff}$  (**Figure 3g**), which are indicative of increased Pal diffusion  
327 throughout the cell except at the septum. In other words, during division (and only  
328 during division) the small population of TolB molecules are harnessed to enhance the  
329 diffusion of a much larger population of Pal molecules in the cell. Once Pal is  
330 dissociated from TolB at the septum it is free to bind newly-formed septal peptidoglycan  
331 and so its levels accumulate. TolB on the other hand diffuses through the inner  
332 periplasm and eventually back through holes in the peptidoglycan layer to return to the  
333 outer periplasm, where the cycle repeats. Effectively then, TolB acts as a TolA-powered  
334 conveyor belt bringing Pal to the septum. This interpretation also explains the ‘action-at-  
335 a-distance’ observed on Pal diffusion when TolQ-TolR-TolA becomes localised at the  
336 septum. Another consequence of this localisation is that Pal bound at the septum is  
337 kept free of TolB since it is continually dissociated by TolA, explaining why Pal at  
338 division sites has the same diffusive characteristics as Pal in non-dividing cells.

339 In conclusion, the mobilisation-and-capture mechanism (**Figure 5**) underpinning  
340 Pal accumulation by the Tol system at division sites is an elegant solution to the problem  
341 of how to actively stabilize the OM when the membrane itself is not energized and  
342 neither is the protein doing the stabilising. An important outcome of this mechanism is  
343 that the mobility and localisation of Pal are both tuned to the division state of the cell.

344

345 **Materials & Methods**

346

347 **Strain and plasmid construction**

348 Plasmid pREN126 encoding *E. coli* Pal-mCherry was generated by ligating  
 349 XbaI/SalI digest of *pal* gene PCR-amplified form MG1655 genomic DNA fused  
 350 together<sup>33</sup> with the mCherry gene optimised for *E. coli* expression into the plasmid  
 351 pDOC-K. The strain RKCK8 (*pal::pal-GGGGS-mCherry*) was engineered using  $\lambda$ -Red  
 352 recombination based on the gene-doctoring protocol<sup>34</sup>, as described previously<sup>32</sup>.  
 353 QuickChange mutagenesis was used to introduce point mutations into genes where  
 354 needed.

| Strain name  | Genotype                                                                                                                                                                                                       | Reference  |
|--------------|----------------------------------------------------------------------------------------------------------------------------------------------------------------------------------------------------------------|------------|
| BL21 (DE3)   | F- <i>ompT hsdSB(rB-, mB-) gal dcm</i>                                                                                                                                                                         | 35         |
| DH5 $\alpha$ | F- <i>endA1 glnV44 thi-1 recA1 relA1 gyrA96 deoR</i><br>nupeptidoglycan $\Phi$ 80dlacZ $\Delta$ M15 $\Delta$ ( <i>lacZYA-argF</i> )U169, <i>hsdR17</i> (rK- mK+), $\lambda$ -                                  | 36         |
| BW25113      | F-, $\Delta$ ( <i>araD-araB</i> ), $\Delta$ <i>lac</i> (:: <i>rrnB-3</i> ), $\lambda$ -, <i>rph-1</i> ,<br>$\Delta$ ( <i>rhaD-rhaB</i> ), <i>hsdR514</i>                                                       | 37         |
| JW0729-3     | F-, $\Delta$ ( <i>araD-araB</i> )567, $\Delta$ <i>lacZ4787</i> (:: <i>rrnB-3</i> ),<br>$\Delta$ <i>tolA788</i> :: <i>kan</i> , $\lambda$ -, <i>rph-1</i> , $\Delta$ ( <i>rhaD-rhaB</i> )568,<br><i>hsdR514</i> | 38         |
| JW5100-1     | F-, $\Delta$ ( <i>araD-araB</i> )567, $\Delta$ <i>lacZ4787</i> (:: <i>rrnB-3</i> ),<br>$\Delta$ <i>tolB789</i> :: <i>kan</i> , $\lambda$ -, <i>rph-1</i> , $\Delta$ ( <i>rhaD-rhaB</i> )568,<br><i>hsdR514</i> | 38         |
| JW0731-1     | F-, $\Delta$ ( <i>araD-araB</i> )567, $\Delta$ <i>lacZ4787</i> (:: <i>rrnB-3</i> ), $\Delta$ <i>pal-790</i> :: <i>kan</i> , $\lambda$ -, <i>rph-1</i> , $\Delta$ ( <i>rhaD-rhaB</i> )568, <i>hsdR514</i>       | 38         |
| RKCK8        | BW25113 <i>pal::pal-GGGGS-mCherry</i> ( $\Delta$ Agel)( $\Delta$ EcoRI)- <i>kan</i>                                                                                                                            | This study |
| JSCK1        | JW0729-3 $\Delta$ <i>kan</i> :: <i>frt</i>                                                                                                                                                                     | This study |
| RKCK10       | JSCK1 $\Delta$ <i>pal::pal-GGGGS-mCherry</i> ( $\Delta$ Agel)( $\Delta$ EcoRI)- <i>kan</i>                                                                                                                     | This study |
| JSCK4        | JW5100-1 $\Delta$ <i>kan</i> :: <i>frt</i>                                                                                                                                                                     | This study |
| RKCK12       | JSCK4 <i>pal::pal-GGGGS-mCherry</i> ( $\Delta$ Agel)( $\Delta$ EcoRI)- <i>kan</i>                                                                                                                              | This study |
| JSCK8        | RKCK8 $\Delta$ <i>kan</i> :: <i>frt</i>                                                                                                                                                                        | This study |
| RKCK13       | JSCK8 <i>tolB::tolB</i> $\Delta$ 22-33                                                                                                                                                                         | This study |
| RKCK14       | JSCK8 <i>tolB::tolB</i> (I25A V26A I27A)                                                                                                                                                                       | This study |



|        |                                         |            |
|--------|-----------------------------------------|------------|
| RKCK15 | JSCk8 <i>tolB::tolB</i> (H246A T292A)   | This study |
| RKCK16 | BW25113 <i>pal::pal-GGGGS-PAmCherry</i> | This study |
| RKCK19 | BW25113 <i>pal::pal(1-59)-PAmCherry</i> | This study |

355

| Plasmid          | Genotype                                                                                                                                                | Reference                 |
|------------------|---------------------------------------------------------------------------------------------------------------------------------------------------------|---------------------------|
| pACBSCE          | <i>Para</i> controlled $\lambda$ -Red recombinase                                                                                                       | 34                        |
| pDOC-K           | <i>bla</i> flanked by FLP                                                                                                                               | 34                        |
| pCP20            | <i>bla cat cl857 repA(ts) PR::flp</i>                                                                                                                   | (Datsenko & Wanner, 2000) |
| pREN126          | pDOC-K-336bp upstream <i>pal</i> ( $\Delta$ AgeI)- <i>pal-GGGGS-mCherry</i> ( $\Delta$ AgeI)( $\Delta$ EcoRI)- <i>bla</i> -300 bp-downstream <i>pal</i> | This study                |
| pNP4             | pBR322-GFP-t- <i>tolA</i>                                                                                                                               | 21                        |
| pREN88           | pBR322-GFP-t- <i>tolA</i> (H22A)                                                                                                                        | 32                        |
| pDAB17           | pBAD24- <i>tolB</i>                                                                                                                                     | 18                        |
| peptidoglycanP3  | pBAD24- <i>tol</i> -HIS <sub>6</sub>                                                                                                                    | This study                |
| peptidoglycanP89 | pBAD24 <i>ptol</i> (H146A)-HIS <sub>6</sub>                                                                                                             | This study                |
| peptidoglycanP90 | pBAD24- <i>tol</i> (D150A)-HIS <sub>6</sub>                                                                                                             | This study                |
| peptidoglycanP95 | pBAD24- <i>tol</i> (T165A)-HIS <sub>6</sub>                                                                                                             | This study                |
| PREN71           | pBAD24- <i>tol</i> (L25A)                                                                                                                               | This study                |
| pREN72           | pBAD24- <i>tol</i> (L25A, I27A)                                                                                                                         | This study                |
| pREN70           | pBAD24- <i>tol</i> (L25I, I27A)                                                                                                                         | This study                |
| pREN73           | pBAD24- <i>tol</i> (L25A, V26A, I27A)                                                                                                                   | This study                |
| pREN28           | pQE-Im9-FXa- <i>P. aeruginosa</i> TolA                                                                                                                  | This study                |

356

### 357 Live cell imaging

358

359 *Sample preparation.* Overnight supplemented M9-glucose (2 mM MgSO<sub>4</sub>, 0.1 mM  
 360 CaCl<sub>2</sub>, 0.4% (w/v) D-glucose) cultures were diluted in fresh medium with appropriate  
 361 antibiotics and IPTG for strains expressing TolA from plasmids. Cultures were grown at  
 362 37°C to OD<sub>600</sub> 0.3. Cells were centrifuged at 7000 x g for 1 min, resuspended in 1 ml of  
 363 fresh media and treated with CCCP (0.1 mM, RT for 5 min, Sigma #C2759) for PMF  
 364 decoupling, sodium azide (50  $\mu$ g/ml, RT for 30 min, Sigma #S2002) for ATPase  
 365 inhibition or chloramphenicol (30  $\mu$ g/ml, 37°C for 30 min, Sigma #C0378) for translation

366 inhibition. Agar pads were prepared by mixing supplemented M9-glucose medium with  
367 1% agarose and pouring 200  $\mu$ l into 1.5 x 1.6 gene frame (Thermo Scientific #AB0577)  
368 attached to the slide. For pad formation, the gene frame was sealed by a coverslip until  
369 agarose solidified. Where drug were used, such as chloramphenicol, they were  
370 incorporated into the pad. 5  $\mu$ l of cells were pipetted onto the agar pad, allowed to dry  
371 and sealed with a clean cover slip. For Pal-PAmCherry and lipoylated-PAmCherry SPT-  
372 PALM experiments, *E. coli* strains: RKCK16 and RKCK19 were used, respectively. Cells  
373 were grown to OD<sub>600</sub> 0.4 – 0.6, a 500  $\mu$ l aliquot was pelleted and resuspended in 40  $\mu$ l  
374 M9-glucose supplemented with 30  $\mu$ g/ml kanamycin. 7.2  $\mu$ l of resuspended cells were  
375 loaded onto a 1% agarose pad using PBS as the diluent.

376

377 *TIRFM acquisition.* Live cells were imaged using an Oxford NanolMager (ONI) super-  
378 resolution microscope equipped with four laser lines (405/473/561/640 nm) and x100 oil  
379 immersion objective (Olympus 1.49 NA). Pal-mCherry fluorescence images were  
380 acquired by scanning a 50  $\mu$ m x 80  $\mu$ m area with a 561 nm laser (0.2 mW) set at 49°  
381 incidence angle (100 ms exposition), resulting in a 512 x 1024 pixel image. For  
382 PAmCherry experiments, fluorophores were first activated by 1 s exposure to a 405 nm  
383 laser. Images were recorded by NimOS software associated with the ONI instrument. If  
384 not noted otherwise, each image was acquired as a 100- or 200-frame stack for  
385 brightfield and fluorescence channels, respectively. For analysis, images were stacked  
386 into composite images using average intensity as a projection type in ImageJ (version  
387 1.52n).

388

389 *FRAP acquisition.* Microscopy was performed on a Zeiss LSM 880/Axio Examiner Z1  
390 motorised upright laser scanning microscope equipped with Argon multiline 458/488/514  
391 nm (25 mW), and HeNe 561 nm (1 mW) and  $\times 63$  oil-immersion objective (Zeiss, NA 1.4)  
392 set to 37 °C. Cells were imaged by scanning the laser over a  $13.5 \times 13.5 \mu\text{m}$  area with  
393 the scan speed set to 8 or 16 and a digital zoom of  $\times 10$  or  $\times 20$ , respectively. The  
394 diameter of the pinhole was  $0.83 \mu\text{m}$ . Bleaching of the set region of interest (ROI) was  
395 performed on  $20 \times 50$  or  $30 \times 80$  pixel area (for 10x or 20x zoom, respectively) using 15  
396 scan iterations and the corresponding laser power set to 100%. Two images were  
397 acquired before bleaching and 10 images, with a time interval of 1 minute, recorded  
398 after bleaching using an automatic time course function. Instrument autofocus was used  
399 between images in reflection mode. All images were acquired using 2% maximum laser  
400 power. For all fluorescent images, corresponding differential interference contrast (DIC)  
401 images were recorded using transmitted light. All images were recorded using Zeiss  
402 Zen 2011 software.

403  
404 *PALM-SPT acquisition.* Pal-PAmCherry and lipoylated-PAmCherry SPT microscopy  
405 was conducted at 37°C and 25°C, respectively on an ONI inverted super-resolution  
406 microscope. In order to reduce XY drift, slides were placed in the pre-heated  
407 microscope for 30 minutes before imaging. To image Pal-PAmCherry, an excitation  
408 laser of 561 nm was on for the entire duration of imaging at a power output of  
409 approximately 20-30 mW, an activation laser of 405 nm was manually pulsed at a power  
410 output of approximately 20-60 mW. For Pal-PAmCherry and lipoylated-PAmCherry SPT  
411 20,000-30,000 frames were collected with an exposure time of 50 ms. For both Pal-  
412 PAmCherry and lipoylated-PAmCherry three repeats were acquired for data analysis.

413 *SIM acquisition*

414 Live bacteria were mounted between an agarose pad and a coverslip. Imaging was  
415 processed at room temperature with a  $\times 60$ , NA 1.42 oil objective on a Deltavision OMX  
416 V3 Blaze (GE) equipped with a 488 laser. Image stacks of several  $\mu\text{m}$  thickness were  
417 taken with  $0.125\ \mu\text{m}$  z-steps and 15 images (three angles and five phases per angle) per  
418 z-section and a 3D-structured illumination with stripe separation of 213 nm. Laser power  
419 was set at 10 % to scan the sample over  $4\ \mu\text{m}$  thickness (32 slices) without too much  
420 photobleaching. Image stacks were reconstructed using Deltavision softWoRx 6.1.1  
421 software with a Wiener filter of 0.002 using wavelength specific experimentally  
422 determined OTF functions (see <sup>32</sup>). *Image analysis:* Cells were automatically aligned  
423 using Image J software so the fluorescent ring appears as a vertical bar from the lateral  
424 projection of 3D-SIM imaging. Distribution of fluorescence intensity along the x-axis of  
425 bacteria was determined using a custom script implemented in MATLAB (version 2012a,  
426 MathWorks) (See <sup>39</sup>). In addition, with noise reduction through application of the built-in  
427 MATLAB medfilt2 median filter, raw images were initially thresholded over 2-fold the  
428 background intensity (optimised to provide a binary image highlighting specific signal  
429 from the septation ring). Intensity along the selected bacteria was measured 11 times  
430 between the bacterial end-points, each at a uniformly spaced offset from the bacterial  
431 long axis. The mean profile was calculated and normalized to the range 0–100 for  
432 comparison between bacteria. Diameter measurements corresponds to the height of  
433 ring, calculated automatically through Image J software from each reconstructed and  
434 filtered image. A total of 30 cells were analysed per condition, in triplicate. All data were  
435 plotted in GraphPad software (Prism V).

436

437 *Image data analysis.* All images were analysed using ImageJ software. Fluorescence  
438 distribution along x-axis of cells was determined by the plot profile function with a line  
439 width of 4 points for TIRFM images and 40 or 80 for FRAP images. Values were then  
440 normalized to 0-100 for comparison between cells in Excel. FRAP values were  
441 normalized using FRAPnorm plugin as described in Rassam et al.<sup>32</sup>. For all  
442 experiments, ~30 cells were analysed from at least three independent repeats per  
443 condition. All data were plotted in GraphPad Prism 8 software.

444  
445 *SPT data analysis.* The ImageJ plugin ThunderSTORM<sup>40</sup> was used to localise single  
446 particles. The PSF Integrated Gaussian method in ThunderSTORM was used for sub-  
447 pixel localisation. Localisation information was imported into the ImageJ plugin  
448 TrackMate<sup>41</sup>, tracks between localisations were determined using a simple LAP tracker  
449 with a maximum linking distance of 500 nm and a gap-closing max frame gap of 0,  
450 trajectory information was exported. For each SPT experiment, a transillumination  
451 image was collected and a superresolution image of Pal-PAmCherry or lipoylated-  
452 PAmCherry distribution was generated from the localisations. With reference to the SPT  
453 output, the transillumination image and the superresolution image, cells were manually  
454 segmented to generate a binarised image, displaying cells in white and background in  
455 black. For Pal-PAmCherry SPT: cells were further separated into dividing and non-  
456 dividing categories dependent on the observation of a septum in the superresolution  
457 image. Custom Python scripts were developed to process the single particle tracking  
458 data, with the following functionality: 1. Elimination of trajectories consisting of fewer  
459 than 5 consecutive localisations. 2. Elimination of trajectories not occurring within cells,  
460 with reference to the binary image. 3. Determination of diffusion coefficients. 4.

461 Determination of the radius of the smallest circle that encapsulates all of the  
462 localisations in a trajectory. 5. Determine the mean uncertainty of the localisations in a  
463 trajectory. 6. Normalise the location of the centroid of each trajectory with respect to the  
464 cell.

465 *Trajectory elimination.* The pixel coordinates of the binarised cells were identified and  
466 stored. The centroid of each trajectory was determined and the XY coordinates rounded  
467 to the nearest whole value, if the trajectory centroid occurred within the coordinates of a  
468 cell they were retained, otherwise they were eliminated. Retained trajectories are  
469 referred to as “refined trajectories”, henceforth.

470  
471 *Diffusion coefficient determination.* For refined trajectories, the mean squared  
472 displacement (MSD) was calculated at 4 lag times: 50, 100, 150 and 200 ms. The line  
473 of best fit of MSDs at these 4 lag times was used to identify the diffusion coefficient  
474 (analogous to the method used in (Rassam et al., 2015)), following the equation:

475 
$$MSD = 4D\Delta t$$

476 where  $D$  is the two dimensional diffusion coefficient. For trajectories in which the line of  
477 best fit of the MSD plot gave a negative value and hence a negative diffusion coefficient,  
478 these diffusion coefficients were eliminated.

479 *Radius of confinement determination.* For each refined trajectory, the centroid of the  
480 trajectory was determined. The radius of the smallest circle, centred at the centroid of  
481 the trajectory, which encapsulated all of the individual localisations of the trajectory was  
482 determined in nm.

483

484 *Trajectory location normalisation.* From the binarised image, an ellipse was fitted to  
485 each cell, using the minor and major axis lengths and the angle of rotation of these  
486 ellipses, cells were normalized so that the long axis of the cell was represented using  
487 values ranging from 0 - 100 arbitrary units and the short axis of the cell was represented  
488 using values ranging from 0 - 50 arbitrary units. These transformations were applied to  
489 the centroid of each refined trajectory to determine the location of trajectories in a  
490 normalised cell.

491

## 492 **Modelling Pal diffusion**

493 We consider Pal as being in one of two states, depending on its binding to  
494 peptidoglycan. We assume that the diffusion of Pal-mCherry when bound to  
495 peptidoglycan is very slow compared to when it is not bound to peptidoglycan so that we  
496 can set the bound diffusion constant to zero. We denote the concentrations (or  
497 molecular number) of free and bound Pal, as a function of position  $x$  along the long axis  
498 of the cell, by  $u = u(x, t)$  and  $v = v(x, t)$ , respectively. Binding to, and unbinding from,  
499 peptidoglycan occur at rates  $k_{on}(x)$  and  $k_{off}(x)$ , respectively, which can vary as a  
500 function of position. We then have the following equations:

$$501 \quad \frac{\partial u}{\partial t} = D \frac{\partial^2 u}{\partial x^2} - k_{on}(x) u + k_{off}(x) v$$

$$502 \quad \frac{\partial v}{\partial t} = -k_{on}(x) u + k_{off}(x) v .$$

503 We further assume that the timescale of binding and unbinding is much shorter than that  
504 of (free) diffusion. This is the so-called effective diffusion regime<sup>42 43</sup> and allows us to

505 write  $v(x, t) = \frac{k_{on}(x)}{k_{off}(x)} u(x, t)$  and thereby derive a single equation for the total  
506 concentration of Pal,  $c = u + v$  :

507 
$$\frac{\partial c}{\partial t} = \frac{\partial^2}{\partial x^2} (D_{eff}(x) c),$$

508 where  $D_{eff}(x) = \frac{k_{off}(x)}{k_{on}(x) + k_{off}(x)} D$  is the effective diffusion coefficient. Note that it can vary  
509 spatially according to the spatially dependent on- and off-rates. However, it has a  
510 simple interpretation; at each spatial location it is the fraction of free molecules multiplied  
511 by the free diffusion coefficient.

512 *Fitting* - The above equation for  $c$  was fitted to the experimental data as follows.  
513 We begin with the mean signal along the length of the cell on each frame. We corrected  
514 for background fluorescence by subtracting the mean background fluorescence outside  
515 the cells. We then binned the data in order to remove noise from over-sampling to an  
516 effective pixel size of 65.5 nm (WT and *tolA* mutants) or 52.4 nm (*tolB* mutant). We next  
517 removed the first and last 2 (binned) pixels to remove effects due to lower signal at the  
518 poles and finally we normalized the sum of the signal to 1. We then assume that Pal is  
519 at equilibrium at any given moment in time and take the pre-bleach frame as the  
520 equilibrium profile. The equation above, combined with vanishing flux boundary  
521 conditions has an equilibrium profile that is, up to a constant, the reciprocal of  $D_{eff}(x)$ .  
522 The pre-bleach frame is therefore taken to specify, up to a constant,  $D_{eff}(x)$ . We  
523 determine the proportionality constant by fitting the solution to the above equation with  
524 the first post-bleach frame as the initial condition to the experimental post bleach  
525 frames. Including the first post-bleach frame, we fit the model output to the data from six  
526 frames each separated in time by 2 min intervals (the final frame is 10 min post-bleach).



527 We used the *pdepe* solver in Matlab to numerically solve the equation for  $c$  and the  
528 function *immse* to calculate the mean square error between the simulated and  
529 experimental data (the value was multiplied by 100000 to avoid numerical issues with  
530 small numbers). The fitting was performed by the *patternsearch* function of the Global  
531 Optimization toolbox. The initial guess was a diffusion constant of  $10^{-3} \mu\text{m}^2\text{s}^{-1}$ ,  
532 converted into units of pixels, the length unit on which the solver was run. Our results  
533 were not sensitive to this choice. Applying this procedure, we obtain a spatially-varying  
534 effective diffusion constant for each cell. The violin plots in **Figure 3f** show the median  
535 of the profile for dividing and non-dividing cells while those in **Supplementary Figure 5b**  
536 are for mutant cells. Each cell has a different length and so to combine the data from all  
537 cells (for a given mutant/dividing state), we re-express the effective diffusion constant in  
538 terms of the relative, rather than absolute, position in the cell, using interpolation (via  
539 *interp1*) to obtain this profile at the same 51 relative positions (0, 0.02, ..., 1) for each  
540 cell. We then combine the spatial profiles from all cells (**Figure 3g and Supplementary**  
541 **Figure 5c**).

542

### 543 **Western blotting**

544 Cultures were grown as described in sample preparation for live microscopy.  
545 Aliquots of 1 ml were centrifuged for 3 min at 10,000  $\times g$  and resuspended in 30  $\mu\text{l}$  of  
546 Laemmli sample buffer and denatured for 15 min to lyse the cells. Samples were run on  
547 a 15% SDS-PAGE gel (30 mA, 30 min), blotted on Sequi-Blot PVDF membrane (Biorad  
548 #1620182) and blocked with 8% Marvel dried skimmed milk in Tris buffered saline buffer  
549 with Tween 20 (TBST buffer) overnight at room temperature. Blots were probed with  
550 primary rabbit anti-Pal (1:1000) and anti-ToIB (1:500) antibodies in 4% milk in TBST

551 buffer for 1 h at room temperature. Membranes were then washed with TBST buffer (5  
552 x 1 min) and probed with secondary goat anti-rabbit antibodies conjugated with  
553 peroxidase (1:1000, Sigma #A6154). Blots were washed as described above and  
554 detection was carried out using Amersham ECL Western Blotting Select Detection  
555 Reagent (GE Lifesciences #RPN2235) according to the manufacturer's instructions in  
556 GBOX-CHEMI-XRQ. Images were recorded using GeneSys software.

557

### 558 **Protein expression and purification**

559 The C-terminal domain of *Pseudomonas aeruginosa* TolA (TolA<sup>224-347</sup>) and its  
560 derivatives were expressed as fusion proteins with an N-terminal, His-tagged Im9 in *E.*  
561 *coli* BL21 (DE3) cells after induction with 1 mM IPTG 37°C. After 4 h growth, cells were  
562 harvested by centrifugation (4000 x g, 4°C) and resuspended in binding buffer (50 mM  
563 Tris, 1 mM MgCl<sub>2</sub>, 2 mM imidazole, 1 mM PMSF (Sigma), 300 mM NaCl, pH 7.5, with  
564 protease inhibitor cocktail (Roche cOMplete Easypack tablets)). Cells were lysed by  
565 sonication on ice (Misonix Sonicator 4000). Cell debris was removed by centrifugation  
566 (Beckman JA-25.50, 48,000 x g, 4°C, 30 min), and the supernatant loaded onto a freshly  
567 charged 5 mL HisTrap FF Ni-affinity column (GE Healthcare) at 1 mL/min at 4 °C (50  
568 mM Tris buffer, 50 mM NaCl, 2 mM imidazole, pH 7.5) and eluted using a linear gradient  
569 of imidazole (2-250 mM). Fractions containing Im9-TolA<sup>224-347</sup>, were pooled and  
570 dialyzed overnight against 50 mM Tris, 100 mM NaCl, 5 mM CaCl<sub>2</sub> pH 7.5 at 4°C. The  
571 sample was concentrated to ~5 mg/mL in a 10 kDa spin concentrator (Vivaspin) and the  
572 Im9-TolA<sup>224-347</sup> fusion cleaved overnight at 4°C with 150 Units of Novagen FXa at a ratio  
573 of 2 Units per mg of fusion protein. Cleaved TolA<sup>224-347</sup> was purified by Ni-affinity FF His-  
574 Trap as above. 1 mM PMSF was added to pooled fractions containing TolA<sup>224-347</sup> and

575 the concentrate dialysed against 50 mM Tris, 100 mM NaCl, pH 7.5 at 4°C before further  
576 purification on an S75 Superdex 26/60 column, equilibrated in 50 mM Tris, 100 mM  
577 NaCl, pH 7.5 at 4°C. The purified protein was snap frozen in liquid nitrogen and stored  
578 at -80 °C. Uniformly <sup>15</sup>N-labelled or <sup>15</sup>N- and <sup>13</sup>C-labelled Im9-TolA<sup>224-347</sup> was prepared  
579 with M9 growth media (0.0477 M Na<sub>2</sub>HPO<sub>4</sub>, 0.022 M KH<sub>2</sub>PO<sub>4</sub>, 8.6 mM NaCl, 4 μM  
580 ZnSO<sub>4</sub>, 1 μM MnCl<sub>2</sub>, 0.7 μM H<sub>3</sub>BO<sub>3</sub>, 0.7 μM CuSO<sub>4</sub>, 2 μM FeCl<sub>3</sub>, 2 mM MgSO<sub>4</sub>, 0.1 mM  
581 CaCl<sub>2</sub>, 0.3% (w/v) glucose (<sup>13</sup>C glucose from Sigma), 0.1% (w/v) ammonium chloride  
582 (<sup>15</sup>N NH<sub>4</sub>Cl from Sigma).

583 Unlabelled *E. coli* or *P. aeruginosa* TolB<sup>22-34</sup> (the N-terminus of secreted TolB)  
584 and mutant variants were used as synthetic peptides with amidated C-termini  
585 (thinkpeptides® UK (ProImmune)). TolB<sup>22-34</sup> peptides were typically only soluble up to  
586 ~3 mM in the buffered solutions. For fluorescence anisotropy experiments, *P.*  
587 *aeruginosa* TolB<sup>22-34</sup> was labelled with fluoresceine isothiocyanate through a C-terminal  
588 lysine residue incorporated into the peptide sequence. The C-terminal end of TolB<sup>22-34</sup>  
589 plays no role in TolA binding.

590 <sup>13</sup>C/<sup>15</sup>N-labelled *P. aeruginosa* TolB<sup>22-34</sup> was generated by expressing the TolB  
591 sequence from the pMMHb plasmid as a fusion with the TrpLE leader sequence which  
592 contains an intervening methionine residue for cyanogen bromide cleavage and release  
593 of the peptide <sup>44</sup> <sup>45</sup>. Protein expression in M9 media was induced with 1 mM IPTG and  
594 cultures grown overnight at 37°C to a final OD<sub>600</sub> of ~1.4. Protein was purified from  
595 inclusion bodies solubilized in 6 M GndHCl, 25 mM Tris pH 8.0, 5 mM imidazole.  
596 Following centrifugation, supernatant was loaded onto a 5 mL Ni-affinity column (GE  
597 HisTrap) equilibrated in 6 M guanidine, 25 mM Tris pH 8.0, 5 mM imidazole. Protein  
598 was eluted from the column stepwise (25-500 mM imidazole in 6 M guanidine, 25 mM

599 Tris pH 8.0). Column fractions were dialyzed against 4 L MilliQ water over 2 days to  
600 precipitate protein which was then pelleted. The ToIB<sup>22-34</sup> peptide was chemically  
601 cleaved by dissolving the pellet into 5 mL 70% v/v formic acid and 0.5 g CNBr added,  
602 kept under nitrogen and the reaction allowed to continue for 2.5 h. Cleavage was  
603 quenched by a ten-fold dilution with water followed by flash freezing and lyophilization.  
604 Recombinant peptide was purified by reverse phase HPLC. ToIB<sup>22-34</sup> was eluted on a  
605 linear gradient of 0-95% v/v acetonitrile with 0.1% v/v TFA using a Dionex 218TP C18  
606 VYDAC column attached to an AKTA Purifier. Cleavage efficiency was routinely ~80-  
607 90%. Fractions corresponding to peptide were confirmed by mass spectrometry.

608

#### 609 **Protein concentration**

610 Protein concentrations were determined by UV absorbance at 280 nm using the  
611 method of Gill and von Hippel<sup>46</sup>.

612

#### 613 **Nuclear magnetic resonance spectroscopy**

614 NMR experiments were carried out using spectrometers operating at <sup>1</sup>H  
615 frequencies ranging from 500 to 950 MHz. The spectrometers were equipped with  
616 Oxford Instruments magnets and home-built triple-resonance pulsed-field gradient  
617 probes (600, 750 and 950 MHz) or with Bruker Avance consoles and TCI CryoProbes  
618 (500 and 600 MHz). NMR data were acquired using either GE/Omega software using  
619 pulse sequences written in-house, or Topspin software and pulse sequences in the  
620 Topspin libraries from Bruker Biospin. All data processing was conducted using  
621 NMRPipe<sup>47</sup>. Processed spectra were visualized and assigned using the CCPN software  
622 suite<sup>48</sup>. All NMR data were collected at 20°C.

623 Resonance assignments for ToIA<sup>224-347</sup> bound to ToIB<sup>22-34</sup> were obtained using  
624 standard 2D and 3D double and triple resonance data including <sup>15</sup>N-HSQC, <sup>13</sup>C-HSQC,  
625 <sup>15</sup>N-edited TOCSY-HSQC, HNC0, HNCACO, HNCA, CBCANH, CBCA(CO)NH,  
626 HBHA(CBCACO)NH, H(CCCO)NH, (H)CC(CO)NH and HCCH-TOCSY. The NMR  
627 samples contained 0.6 mM <sup>15</sup>N or <sup>13</sup>C/<sup>15</sup>N-labelled ToIA<sup>224-347</sup> and 3 mM unlabelled  
628 ToIB<sup>22-34</sup>. Resonance assignments for the ToIB<sup>22-34</sup> peptide in complex with ToIA<sup>224-347</sup>  
629 were obtained using 2D versions of some of the experiments listed above using a  
630 sample containing 0.2 mM <sup>13</sup>C/<sup>15</sup>N-labelled ToIB<sup>22-34</sup> and 1.1 mM unlabeled ToIA<sup>224-347</sup>.  
631 Details of the assignments are included in BMRB deposition 27397.

632 Residual dipolar couplings (RDCs) for <sup>15</sup>N-ToIA<sup>224-347</sup> bound to ToIB<sup>22-34</sup> were  
633 measured using a sample aligned in 5% w/v C<sub>12</sub>E<sub>6</sub> PEG/n-hexanol and the IPAP NMR  
634 experiment<sup>49 50</sup>. Values for the axial and rhombic components of the alignment tensor  
635 were estimated initially from the shape of the distribution of RDC values and then refined  
636 by fitting using in-house software and the previously determined X-ray structure of free  
637 ToIA (PDB: 1LR0) and the RDC values for regions of secondary structure not involved in  
638 peptide binding; D<sub>a</sub>/R values of 13.7/0.01 were used for the structure calculations.

639

## 640 **Structure determination**

641 The structure of ToIA<sup>224-347</sup> in complex with ToIB<sup>22-34</sup> was determined using ARIA  
642 (version 2.3), interfaced to CNS (version 1.2)<sup>51-55</sup>. NOE distance restraints were set as  
643 ambiguous restraints in early calculations, peak ambiguity was decreased during eight  
644 iterations before a final water refinement calculation. Distance restraints were derived  
645 from NOE peak intensities in <sup>15</sup>N-edited NOESY-HSQC, <sup>15</sup>N-edited HSQC-NOESY-  
646 HSQC <sup>13</sup>C-edited NOESY-HSQC (collected in 95%<sup>1</sup>H<sub>2</sub>O/5%<sup>2</sup>D<sub>2</sub>O and in 100% <sup>2</sup>D<sub>2</sub>O) and

647  $^{13}\text{C}$ ,  $^{15}\text{N}$  isotope-filtered  $^{13}\text{C}$ -separated NOESY experiments; analysis of these data sets  
648 allowed protein-protein, protein-peptide and peptide-peptide NOEs to be distinguished.  
649 Backbone  $\phi$  and  $\psi$  torsion angles for ToIA<sup>224-347</sup> and ToIB<sup>22-34</sup> were estimated from  $\text{C}\alpha$ ,  
650  $\text{C}\beta$ ,  $\text{C}'$ ,  $\text{N}$  and  $\text{H}\alpha$  chemical shifts using the program DANGLE<sup>56</sup>. Hydrogen bond  
651 restraints were based on slowly exchanging amides identified in  $^{15}\text{N}$ -HSQC spectra  
652 collected in  $\text{D}_2\text{O}$  and observed NOEs characteristic of regular secondary structure. A  
653 square well potential and a force constant of 0.5 were used for the RDC restraints (SANI  
654 terms) with experimental error for the RDCs set to 2 Hz. In the final ARIA iteration, 600  
655 structures were calculated; the 20 lowest energy structures were selected for a final  
656 round of water refinement. The family of structures was then validated using  
657 PROCHECK-NMR.

658

### 659 **Isothermal titration calorimetry**

660 All ITC experiments were performed using the C-terminal domain of *E. coli* ToIA  
661 (ToIA<sup>224-347</sup>). ToIA was dialysed into 50 mM Hepes buffer, 50 mM NaCl at pH 7.5  
662 overnight at 4°C and precipitates removed by centrifugation (10000g, 10min). The  
663 concentration was adjusted to 150  $\mu\text{M}$ . ToIA was loaded into the cell and synthetic ToIB  
664 peptide (residues 22-33; 2 mM) loaded into the syringe of an iTC200 microcalorimeter  
665 (Microcal/GE Healthcare). Titration consisted of 20 injections (1 x 0.4  $\mu\text{l}$ , 19 x 2  $\mu\text{l}$ )  
666 measured at 25°C with an interval of 150 s between injections, and a stirring speed of  
667 1000 rpm. Heats of dilutions were measured by injecting syringe samples into buffer  
668 under identical titration conditions and subtracted from each data set. Data were  
669 analysed using Origin 7.0 software, and fitted to a single site binding model.

## 670 **Fluorescence Anisotropy**

671 Fluorescence anisotropy experiments were used to observe the change in overall  
672 anisotropy of *P. aeruginosa* TolB<sup>22-34</sup> FITC in complex with the C-terminal domain of  
673 TolA. A titration curve was recorded using 40  $\mu$ L fractions in a 96-well, black absorbent,  
674 100  $\mu$ L plate, n=3. Data analysis was performed in SigmaPlot 12.0, using a non-linear  
675 regression dynamic curve fit using the quadratic equation:

$$676 \quad f = (A_T + B_T + k \pm \sqrt{(A_T + B_T + k)^2 - 4A_TB_T})/2$$

677 where:  $f$  = concentration of TolA-TolB,  $A_T$  = Total concentration of TolA,  $B_T$  = Total  
678 concentration of TolB, and  $k = K_d$ .

679 Experiments were carried out using either a CLARIOstar plate reader or a  
680 Fluoromax- 4 spectrofluorimeter (Horiba JobinYvon). Titrations were carried out  
681 between 0 and 1.2 mM TolA. The fluorophore target was a fluorescein isothiocyanate-  
682 labelled TolB<sup>22-34</sup> peptide (Proimmune). FITC excitation wavelength used was 495 nm  
683 with an emission wavelength at 519 nm. All experiments were conducted in 50 mM Tris  
684 100 mM NaCl pH 7.0 and used light-blocking tubes to minimize quenching.

685 Stopped-flow anisotropy was used to determine on- and off-rates of the TolA-  
686 TolB complex. Experiments were conducted on an Applied Photophysics SX20  
687 instrument set up for 1:1 single mixing and thermostated using a circulating water bath  
688 at 25°C. All stopped-flow experiments were carried out in 50 mM Tris pH 7.0, 100 mM  
689 NaCl and under pseudo-first order conditions. To observe anisotropy of FITC  
690 fluorescence the apparatus was set up using an SX/FP polarization accessory. FITC  
691 was excited at 470 nm and emission was monitored above 515 nm using cut-off filters at  
692 both emission channels in the T-mode. Monochromator entrance and exit slits were set  
693 to 2mm. A total of 4,000-10,000 data points were collected for each reaction. At least 4

694 anisotropy traces were collected for each reaction and averaged for each time-  
695 dependence fit. All anisotropy traces were fit to a single exponential rate equation.  
696 Each reaction concentration was collected in triplicate, using recombinant protein from  
697 different protein purification runs. SigmaPlot was used for linear regression analysis to  
698 fit the dependence of  $k_{obs}$  on the varied concentration of TolA. Titrations were  
699 performed at increasing concentration of protein relative to a constant concentration of  
700 peptide at 1  $\mu$ M. Experiments were typically performed with 4-10 second data collection  
701 periods.

702

### 703 **Assessing the stability of the *E. coli* OM**

704 The stability of the *E. coli* outer membrane was assessed for *tol* phenotype and  
705 impaired growth in the presence of SDS, for engineered strains and plasmid-  
706 transformed strains. Overnight cultures were used to inoculate 5 mL LB cultures with  
707 appropriate antibiotic and subsequently brought to log phase ( $OD_{600} \sim 0.4$ ). Aliquots of  
708 these cultures were then spotted at regular intervals on SDS-containing plates (0.4 and  
709 2%) in serial dilutions of spotted cell densities, from 0.02 to 0.000002 using the initial  
710  $OD_{600}$  measurement. Plates were then incubated at 37°C overnight. Images were  
711 recorded in GBOX-CHEMI-XRQ, using GeneSys software. Cultures unable to grow in  
712 the presence of 2% SDS are deemed to have destabilized outer membranes.

713

### 714 **Steered molecular dynamics simulations of the TolB-Pal complex**

715 The structure of the *E. coli* TolB-Pal complex was obtained from the Protein Data  
716 Bank (PDB: 2W8B)<sup>18</sup>. The disordered N-terminus of Pal, not present in the crystal  
717 structure, was modelled using Modeller 9.19<sup>57</sup> and attached to the tripalmitoyl-S-



718 glyceryl-cysteine residue as previously described<sup>58</sup>. The tripalmitoyl-S-glyceryl-cysteine  
719 residue was then inserted into the inner leaflet of an *E. coli* outer membrane model<sup>59</sup>.  
720 Mg<sup>2+</sup> ions were added to facilitate cross-linking between lipopolysaccharide head groups  
721 in the membrane. The system was then solvated with the SPC water molecules<sup>60</sup> and  
722 neutralised with 0.15 M NaCl. A short 10 ns equilibration simulation was performed  
723 whereby all the heavy atoms of the proteins were positionally restrained using a force  
724 constant of 1000 kJ mol<sup>-1</sup>. The temperature was maintained at 310 K using a velocity  
725 rescale thermostat<sup>61</sup>, whilst the pressure was kept at 1 atm using a semi-isotropic  
726 pressure coupling to a Berendsen barostat<sup>62</sup>. Long range electrostatic interactions were  
727 calculated using the particle mesh Ewald method<sup>63</sup>, with the short range electrostatic  
728 and van der Waals cut-offs set to 1.4 nm. A time step of 2 fs was used as all bonds were  
729 constrained using the LINCS algorithm<sup>64</sup>.

730       After the equilibration simulation, the positional restraints on the protein were  
731 removed and a 100 ns equilibrium simulation was performed to allow the N-terminal  
732 linker of Pal to contract, resulting in interactions between Pal and the outer membrane.  
733 All simulation parameters were maintained except the pressure coupling, which was  
734 changed to the Parrinello-Rahman barostat<sup>65</sup>. The final snapshot of this simulation was  
735 used to denote the bound configuration of the TolA binding site in the TolB-Pal complex.  
736 To generate the configuration in which the TolA binding site of TolB was disordered, a  
737 steered MD simulation was performed whereby a harmonic spring with a force constant  
738 of 1000 kJ mol<sup>-1</sup> nm<sup>-2</sup> was attached to residue Glu22 (the N-terminus) and pulled along  
739 the z-axis (perpendicular to the plane of the membrane) at a constant velocity of 0.5 nm  
740 ns<sup>-1</sup>. This resulted in the detachment of the TolA binding site from the surface of the  
741 TolB  $\beta$ -propeller domain.

742 To estimate the force required to dissociate the TolB-Pal complex in the two  
743 configurations, further steered MD simulations were performed. A harmonic spring with  
744 a force constant of  $1000 \text{ kJ mol}^{-1} \text{ nm}^{-2}$  was attached to the centre of mass of TolB and  
745 pulled along the z-axis away from Pal at a constant velocity of  $0.5 \text{ nm ns}^{-1}$ . All the heavy  
746 atoms in Pal were positionally restrained using a force constant of  $1000 \text{ kJ mol}^{-1}$ . Five  
747 independent steered MD simulations with different initial velocity distributions were  
748 conducted for each configuration, and average force and standard deviation along the  
749 pulling coordinates were calculated. All simulations were performed using the  
750 GROMACS 2018 code<sup>66</sup> with the GROMOS 54A7 forcefield<sup>67</sup> and visualized in VMD<sup>68</sup>.  
751  
752

753 **Supplementary Table 1. NMR Structure Calculation Statistics**

754 **NOE-derived distance restraints**

|     |                              |      |
|-----|------------------------------|------|
| 755 | Total                        | 2901 |
| 756 | Total Unambiguous            | 2767 |
| 757 | Intraresidue                 | 1337 |
| 758 | Interresidue                 |      |
| 759 | Sequential ( $ i-j =1$ )     | 588  |
| 760 | Short range ( $ i-j =2-3$ )  | 283  |
| 761 | Medium range ( $ i-j =4-5$ ) | 82   |
| 762 | Long range ( $ i-j >5$ )     | 399  |
| 763 | Inter-chain                  | 78   |
| 764 | Total Ambiguous              | 134  |

766 **Hydrogen bond restraints**

|     |                   |    |
|-----|-------------------|----|
| 767 | TolA (intra)      | 27 |
| 768 | TolA–TolB (inter) | 4  |

770 **Dihedral angle restraints**

|     |                       |       |
|-----|-----------------------|-------|
| 771 | TolA ( $\phi/\psi$ )  | 69/69 |
| 772 | TolBp ( $\phi/\psi$ ) | 7/7   |

774 **Residual dipolar couplings (RDCs)**

|     |      |    |
|-----|------|----|
| 775 | TolA | 78 |
|-----|------|----|

777 **Structure statistics**

|     |                                                       |                     |
|-----|-------------------------------------------------------|---------------------|
| 778 | Number of restraint violations (mean $\pm$ s.d.)      |                     |
| 779 | Distance restraint violations $> 0.5 \text{ \AA}$     | $0.95 \pm 1.16$     |
| 780 | Dihedral angle violations $> 5^\circ$                 | $2.15 \pm 0.57$     |
| 781 | RDC violations $> 3 \text{ Hz}$                       | $2.05 \pm 0.97$     |
| 782 | RMSD from experimental restraints (mean $\pm$ s.d.)   |                     |
| 783 | Distance restraints ( $\text{\AA}$ )                  | $0.057 \pm 0.002$   |
| 784 | Dihedral angles ( $^\circ$ )                          | $1.049 \pm 0.136$   |
| 785 | RDC restraints (Hz)                                   | $1.414 \pm 0.050$   |
| 786 | RMSD from idealised geometry (mean $\pm$ s.d.)        |                     |
| 787 | Bond lengths ( $\text{\AA}$ )                         | $0.0114 \pm 0.0002$ |
| 788 | Bond angles ( $^\circ$ )                              | $1.044 \pm 0.016$   |
| 789 | Impropers ( $^\circ$ )                                | $2.379 \pm 0.086$   |
| 790 | Ramachandran analysis <sup>a</sup> (%)                |                     |
| 791 | Residues in most favoured regions                     | 90.4                |
| 792 | Residues in additional allowed regions                | 9.5                 |
| 793 | Residues in generously allowed regions                | 0.2                 |
| 794 | Residues in disallowed regions                        | 0.0                 |
| 795 | Average pairwise RMSD <sup>a,b</sup> ( $\text{\AA}$ ) |                     |
| 796 | Backbone (N, CA, C)                                   | $0.37 \pm 0.06$     |
| 797 | All heavy atoms                                       | $1.03 \pm 0.12$     |

798 <sup>a</sup> Statistics applied to residues 3-9 & 254-340

799 <sup>b</sup> Pairwise RMSD calculated for ensemble of 20 lowest energy structures.

800 **References**

- 801 1 Tsang, M. J. & Bernhardt, T. G. Guiding divisome assembly and controlling its activity.  
802 *Current opinion in microbiology* **24**, 60-65, doi:10.1016/j.mib.2015.01.002 (2015).
- 803 2 Yang, X. *et al.* GTPase activity-coupled treadmilling of the bacterial tubulin FtsZ  
804 organizes septal cell wall synthesis. *Science* **355**, 744-747,  
805 doi:10.1126/science.aak9995 (2017).
- 806 3 Egan, A. J. F. Bacterial outer membrane constriction. *Molecular microbiology*,  
807 doi:10.1111/mmi.13908 (2018).
- 808 4 Rojas, E. R. *et al.* The outer membrane is an essential load-bearing element in Gram-  
809 negative bacteria. *Nature* **559**, 617-621, doi:10.1038/s41586-018-0344-3 (2018).
- 810 5 Zhang, G., Meredith, T. C. & Kahne, D. On the essentiality of lipopolysaccharide to  
811 Gram-negative bacteria. *Current opinion in microbiology* **16**, 779-785,  
812 doi:10.1016/j.mib.2013.09.007 (2013).
- 813 6 Nikaido, H. Molecular basis of bacterial outer membrane permeability revisited.  
814 *Microbiology and Molecular Biology Reviews* **67**, 593-656 (2003).
- 815 7 Okuda, S., Freinkman, E. & Kahne, D. Cytoplasmic ATP hydrolysis powers transport  
816 of lipopolysaccharide across the periplasm in *E. coli*. *Science* **338**, 1214-1217,  
817 doi:10.1126/science.1228984 (2012).
- 818 8 Celia, H. *et al.* Structural insight into the role of the Ton complex in energy  
819 transduction. *Nature* **538**, 60-65, doi:10.1038/nature19757 (2016).
- 820 9 Faure, L. M. *et al.* The mechanism of force transmission at bacterial focal adhesion  
821 complexes. *Nature* **539**, 530-535, doi:10.1038/nature20121 (2016).
- 822 10 Petiti, M. *et al.* Tol Energy-Driven Localization of Pal and Anchoring to the  
823 Peptidoglycan Promote Outer-Membrane Constriction. *Journal of molecular biology*,  
824 doi:10.1016/j.jmb.2019.05.039 (2019).
- 825 11 Nagel de Zwaig, R. & Luria, S. E. Genetics and physiology of colicin-tolerant mutants  
826 of *Escherichia coli*. *Journal of bacteriology* **94**, 1112-1123 (1967).
- 827 12 Wei, Y., Li, Z., Chen, B., Liang, H. & Duan, K. Characterization of the orf1-tolQRA  
828 operon in *Pseudomonas aeruginosa*. *Microbiology and immunology* **53**, 309-318,  
829 doi:10.1111/j.1348-0421.2009.00130.x (2009).
- 830 13 Bowe, F. *et al.* At least four percent of the *Salmonella typhimurium* genome is  
831 required for fatal infection of mice. *Infection and immunity* **66**, 3372-3377 (1998).
- 832 14 Gaspar, J. A., Thomas, J. A., Marolda, C. L. & Valvano, M. A. Surface expression of O-  
833 specific lipopolysaccharide in *Escherichia coli* requires the function of the TolA  
834 protein. *Molecular microbiology* **38**, 262-275, doi:mmi2094 [pii] (2000).
- 835 15 Whiteley, M. *et al.* Gene expression in *Pseudomonas aeruginosa* biofilms. *Nature* **413**,  
836 860-864, doi:10.1038/35101627  
837 35101627 [pii] (2001).
- 838 16 Cascales, E., Lloubes, R. & Sturgis, J. N. The TolQ-TolR proteins energize TolA and  
839 share homologies with the flagellar motor proteins MotA-MotB. *Molecular*  
840 *microbiology* **42**, 795-807 (2001).
- 841 17 Parsons, L. M., Lin, F. & Orban, J. Peptidoglycan recognition by Pal, an outer  
842 membrane lipoprotein. *Biochemistry* **45**, 2122-2128 (2006).
- 843 18 Bonsor, D. A. *et al.* Allosteric beta-propeller signalling in TolB and its manipulation  
844 by translocating colicins. *The EMBO journal* **28**, 2846-2857 (2009).

- 845 19 Cascales, E., Gavioli, M., Sturgis, J. N. & Lloubes, R. Proton motive force drives the  
846 interaction of the inner membrane TolA and outer membrane pal proteins in  
847 Escherichia coli. *Molecular microbiology* **38**, 904-915 (2000).
- 848 20 Shrivastava, R., Jiang, X. & Chng, S. S. Outer membrane lipid homeostasis via  
849 retrograde phospholipid transport in Escherichia coli. *Molecular microbiology* **106**,  
850 395-408, doi:10.1111/mmi.13772 (2017).
- 851 21 Gerding, M. A., Ogata, Y., Pecora, N. D., Niki, H. & de Boer, P. A. The trans-envelope  
852 Tol-Pal complex is part of the cell division machinery and required for proper outer-  
853 membrane invagination during cell constriction in E. coli. *Molecular microbiology* **63**,  
854 1008-1025 (2007).
- 855 22 Loftus, S. R. *et al.* Competitive recruitment of the periplasmic translocation portal  
856 TolB by a natively disordered domain of colicin E9. *Proc. Natl. Acad. Sci. USA* **103**,  
857 12353-12358 (2006).
- 858 23 Witty, M. *et al.* Structure of the periplasmic domain of Pseudomonas aeruginosa  
859 TolA: evidence for an evolutionary relationship with the TonB transporter protein.  
860 *EMBO J.* **21**, 4207-4218 (2002).
- 861 24 Peacock, R. S. *et al.* Characterization of TonB interactions with the FepA cork domain  
862 and FecA N-terminal signaling domain. *Biometals* **19**, 127-142, doi:10.1007/s10534-  
863 005-5420-0 (2006).
- 864 25 Noinaj, N., Guillier, M., Barnard, T. J. & Buchanan, S. K. TonB-dependent transporters:  
865 regulation, structure and function. *Annual review of microbiology* **64**, 43-60 (2010).
- 866 26 Abergel, C. *et al.* Structure of the Escherichia coli TolB protein determined by MAD  
867 methods at 1.95 Å resolution. *Structure* **7**, 1291-1300 (1999).
- 868 27 Li, G. W., Burkhardt, D., Gross, C. & Weissman, J. S. Quantifying absolute protein  
869 synthesis rates reveals principles underlying allocation of cellular resources. *Cell*  
870 **157**, 624-635, doi:10.1016/j.cell.2014.02.033 (2014).
- 871 28 Park, J. S. *et al.* Mechanism of anchoring of OmpA protein to the cell wall  
872 peptidoglycan of the gram-negative bacterial outer membrane. *FASEB journal :  
873 official publication of the Federation of American Societies for Experimental Biology*  
874 **26**, 219-228, doi:10.1096/fj.11-188425 (2012).
- 875 29 Hickman, S. J., Cooper, R. E. M., Bellucci, L., Paci, E. & Brockwell, D. J. Gating of TonB-  
876 dependent transporters by substrate-specific forced remodelling. *Nature  
877 communications* **8**, 14804, doi:10.1038/ncomms14804  
878 <https://www.nature.com/articles/ncomms14804#supplementary-information> (2017).
- 879 30 Turner, R. D., Hurd, A. F., Cadby, A., Hobbs, J. K. & Foster, S. J. Cell wall elongation  
880 mode in Gram-negative bacteria is determined by peptidoglycan architecture.  
881 *Nature communications* **4**, 1496, doi:10.1038/ncomms2503 (2013).
- 882 31 Papadakos, G., Housden, N. G., Lilly, K. J., Kaminska, R. & Kleanthous, C. Kinetic basis  
883 for the competitive recruitment of TolB by the intrinsically disordered translocation  
884 domain of colicin E9. *Journal of molecular biology* **418**, 269-280, doi:S0022-  
885 2836(12)00093-9 [pii]  
886 10.1016/j.jmb.2012.01.039 (2012).
- 887 32 Rassam, P. *et al.* Intermembrane crosstalk drives inner-membrane protein  
888 organization in Escherichia coli. *Nature communications* **9**, 1082,  
889 doi:10.1038/s41467-018-03521-4 (2018).

- 890 33 Shevchuk, N. A. *et al.* Construction of long DNA molecules using long PCR-based  
891 fusion of several fragments simultaneously. *Nucleic Acids Res* **32**, e19-e19,  
892 doi:10.1093/nar/gnh014 (2004).
- 893 34 Lee, D. J. *et al.* Gene doctoring: a method for recombineering in laboratory and  
894 pathogenic *Escherichia coli* strains. *BMC Microbiol* **9**, 252, doi:10.1186/1471-2180-  
895 9-252 (2009).
- 896 35 Meselson, M. & Yuan, R. DNA Restriction Enzyme from *E. coli*. *Nature* **217**, 1110-  
897 1114, doi:10.1038/2171110a0 (1968).
- 898 36 Studier, F. W. & Moffatt, B. A. Use of bacteriophage T7 RNA polymerase to direct  
899 selective high-level expression of cloned genes. *Journal of molecular biology* **189**,  
900 113-130 (1986).
- 901 37 Datsenko, K. A. & Wanner, B. L. One-step inactivation of chromosomal genes in  
902 *Escherichia coli* K-12 using PCR products. *Proceedings of the National Academy of*  
903 *Sciences of the United States of America* **97**, 6640-6645,  
904 doi:10.1073/pnas.120163297 (2000).
- 905 38 Baba, T. *et al.* Construction of *Escherichia coli* K-12 in-frame, single-gene knockout  
906 mutants: the Keio collection. *Mol Syst Biol* **2**, 2006.0008-2006.0008,  
907 doi:10.1038/msb4100050 (2006).
- 908 39 Rassam, P. *et al.* Supramolecular assemblies underpin turnover of outer membrane  
909 proteins in bacteria. *Nature* **523**, 333-336 (2015).
- 910 40 Ovesný, M., Křížek, P., Borkovec, J., Svindrych, Z. & Hagen, G. M. ThunderSTORM: a  
911 comprehensive ImageJ plug-in for PALM and STORM data analysis and super-  
912 resolution imaging. *Bioinformatics* **30**, 2389-2390,  
913 doi:10.1093/bioinformatics/btu202 (2014).
- 914 41 Tinevez, J.-Y. *et al.* TrackMate: An open and extensible platform for single-particle  
915 tracking. *Methods* **115**, 80-90, doi:https://doi.org/10.1016/j.ymeth.2016.09.016  
916 (2017).
- 917 42 Carrero, G., Crawford, E., Hendzel, M. J. & de Vries, G. Characterizing fluorescence  
918 recovery curves for nuclear proteins undergoing binding events. *Bulletin of*  
919 *Mathematical Biology* **66**, 1515-1545, doi:10.1016/j.bulm.2004.02.005 (2004).
- 920 43 Sprague, B. L. & McNally, J. G. FRAP analysis of binding: proper and fitting. *Trends in*  
921 *Cell Biology* **15**, 84-91, doi:https://doi.org/10.1016/j.tcb.2004.12.001 (2005).
- 922 44 Staley, J. P. & Kim, P. S. Formation of a native-like subdomain in a partially folded  
923 intermediate of bovine pancreatic trypsin inhibitor. *Protein Science* **3**, 1822-1832,  
924 doi:10.1002/pro.5560031021 (1994).
- 925 45 Claridge, J. K. & Schnell, J. R. in *Protein NMR Techniques* (eds Alexander Shekhtman  
926 & David S. Burz) 165-179 (Humana Press, 2012).
- 927 46 Gill, S. C. & von Hippel, P. H. Calculation of protein extinction coefficients from amino  
928 acid sequence data. *Analytical Biochemistry* **182**, 319-326,  
929 doi:https://doi.org/10.1016/0003-2697(89)90602-7 (1989).
- 930 47 Delaglio, F. *et al.* NMRPipe: A multidimensional spectral processing system based on  
931 UNIX pipes. *Journal of Biomolecular NMR* **6**, 277-293, doi:10.1007/BF00197809  
932 (1995).
- 933 48 Vranken, W. F. *et al.* The CCPN data model for NMR spectroscopy: Development of a  
934 software pipeline. *Proteins: Structure, Function, and Bioinformatics* **59**, 687-696,  
935 doi:10.1002/prot.20449 (2005).

- 936 49 Ruckert, M. & Otting, G. Alignment of biological macromolecules in novel nonionic  
937 liquid crystalline media for NMR experiments. *Journal of the American Chemical*  
938 *Society* **122**, 7793-7797, doi:10.1021/ja001068h (2000).
- 939 50 Ottiger, M., Delaglio, F. & Bax, A. Measurement of J and Dipolar Couplings from  
940 Simplified Two-Dimensional NMR Spectra. *Journal of Magnetic Resonance* **131**, 373-  
941 378, doi:https://doi.org/10.1006/jmre.1998.1361 (1998).
- 942 51 Habeck, M., Rieping, W., Linge, J. P. & Nilges, M. NOE assignment with ARIA 2.0: the  
943 nuts and bolts. *Methods in molecular biology* **278**, 379-402, doi:10.1385/1-59259-  
944 809-9:379 (2004).
- 945 52 Linge, J. P., Habeck, M., Rieping, W. & Nilges, M. ARIA: automated NOE assignment  
946 and NMR structure calculation. *Bioinformatics* **19**, 315-316,  
947 doi:10.1093/bioinformatics/19.2.315 (2003).
- 948 53 Rieping, W. *et al.* ARIA2: automated NOE assignment and data integration in NMR  
949 structure calculation. *Bioinformatics* **23**, 381-382,  
950 doi:10.1093/bioinformatics/btl589 (2007).
- 951 54 Brunger, A. T. *et al.* Crystallography & NMR system: A new software suite for  
952 macromolecular structure determination. *Acta crystallographica. Section D,*  
953 *Biological crystallography* **54**, 905-921 (1998).
- 954 55 Brunger, A. T. Version 1.2 of the Crystallography and NMR system. *Nature protocols*  
955 **2**, 2728-2733, doi:10.1038/nprot.2007.406 (2007).
- 956 56 Cheung, M.-S., Maguire, M. L., Stevens, T. J. & Broadhurst, R. W. DANGLE: A Bayesian  
957 inferential method for predicting protein backbone dihedral angles and secondary  
958 structure. *Journal of Magnetic Resonance* **202**, 223-233,  
959 doi:https://doi.org/10.1016/j.jmr.2009.11.008 (2010).
- 960 57 Sali, A. & Blundell, T. L. Comparative protein modelling by satisfaction of spatial  
961 restraints. *Journal of molecular biology* **234**, 779-815, doi:10.1006/jmbi.1993.1626  
962 (1993).
- 963 58 Samsudin, F., Boags, A., Piggot, T. J. & Khalid, S. Braun's Lipoprotein  
964 Facilitates OmpA Interaction with the *Escherichia coli* Cell Wall.  
965 *Biophysical Journal* **113**, 1496-1504, doi:10.1016/j.bpj.2017.08.011 (2017).
- 966 59 Piggot, T. J., Holdbrook, D. A. & Khalid, S. Electroporation of the E. coli and S. Aureus  
967 Membranes: Molecular Dynamics Simulations of Complex Bacterial Membranes. *The*  
968 *Journal of Physical Chemistry B* **115**, 13381-13388, doi:10.1021/jp207013v (2011).
- 969 60 Berendsen, H. J., Postma, J. P. M., van Gunsteren, W. F. & Hermans, J. (ed B. Pullman)  
970 331-342 (Reidel Publishing, 1981).
- 971 61 Bussi, G., Donadio, D. & Parrinello, M. Canonical sampling through velocity rescaling.  
972 *Journal of Chemical Physics* **126**, doi:Artn 014101  
973 Doi 10.1063/1.2408420 (2007).
- 974 62 Berendsen, H. J. C., Postma, J. P. M., van Gunsteren, W. F., DiNola, A. & Haak, J. R.  
975 Molecular dynamics with coupling to an external bath. *The Journal of Chemical*  
976 *Physics* **81**, 3684-3690, doi:10.1063/1.448118 (1984).
- 977 63 Essmann, U. *et al.* A smooth particle mesh Ewald method. *The Journal of Chemical*  
978 *Physics* **103**, 8577-8593, doi:10.1063/1.470117 (1995).
- 979 64 Hess, B., Bekker, H., Berendsen, H. J. C. & Fraaije, J. G. E. M. LINCS: A linear constraint  
980 solver for molecular simulations. *Journal of Computational Chemistry* **18**, 1463-1472,  
981 doi:10.1002/(SICI)1096-987X(199709)18:12<1463::AID-JCC4>3.0.CO;2-H (1997).

- 982 65 Parrinello, M. & Rahman, A. Polymorphic transitions in single crystals: A new  
983 molecular dynamics method. *Journal of Applied Physics* **52**, 7182-7190,  
984 doi:10.1063/1.328693 (1981).
- 985 66 Abraham, M. J. *et al.* GROMACS: High performance molecular simulations through  
986 multi-level parallelism from laptops to supercomputers. *SoftwareX* **1-2**, 19-25,  
987 doi:<https://doi.org/10.1016/j.softx.2015.06.001> (2015).
- 988 67 Schmid, N. *et al.* Definition and testing of the GROMOS force-field versions 54A7 and  
989 54B7. *European Biophysics Journal* **40**, 843, doi:10.1007/s00249-011-0700-9  
990 (2011).
- 991 68 Humphrey, W., Dalke, A. & Schulten, K. VMD: Visual molecular dynamics. *Journal of*  
992 *Molecular Graphics* **14**, 33-38, doi:[https://doi.org/10.1016/0263-7855\(96\)00018-5](https://doi.org/10.1016/0263-7855(96)00018-5)  
993 (1996).
- 994 69 Pawelek, P. D. *et al.* Structure of TonB in complex with FhuA, E. coli outer membrane  
995 receptor. *Science* **312**, 1399-1402, doi:312/5778/1399 [pii]  
996 10.1126/science.1128057 (2006).
- 997 70 Subramanian, S. & Kearns, D. B. Functional Regulators of Bacterial Flagella. *Annual*  
998 *review of microbiology*, doi:10.1146/annurev-micro-020518-115725 (2019).
- 999 71 Hendrix, J., Flors, C., Dedecker, P., Hofkens, J. & Engelborghs, Y. Dark states in  
1000 monomeric red fluorescent proteins studied by fluorescence correlation and single  
1001 molecule spectroscopy. *Biophysical journal* **94**, 4103-4113,  
1002 doi:10.1529/biophysj.107.123596 (2008).
- 1003 72 Bernadac, A., Gavioli, M., Lazzaroni, J. C., Raina, S. & Lloubes, R. Escherichia coli tol-  
1004 pal mutants form outer membrane vesicles. *Journal of bacteriology* **180**, 4872-4878  
1005 (1998).
- 1006  
1007



1008 **Acknowledgements**

1009 CK acknowledges financial support for this work from the European Research Council  
1010 (Advanced grant 742555; OMPorg) and the Wellcome Trust (Collaborative Award  
1011 201505/Z/16/Z). PGI acknowledges studentship funding from the Medical Research  
1012 Council UK. We thank Eoin Cassels for preliminary ITC data on the *E. coli* TolA-TolB  
1013 complex. We are indebted to Dominika Gruszka (Crick Institute), Nathalie Reichmann  
1014 (Oxford), Nick Housden (Oxford) and Melissa Webby (Oxford) for helpful comments on  
1015 the manuscript and for useful discussions throughout this work and to Jolian Claridge  
1016 and Jason Schnell (Oxford) for assistance with production of isotopically labelled TolB  
1017 peptide.

1018

1019 **Author Contributions**

1020 C.K., S.K. and C.R. designed the experiments. J.S. collected all FRAP and confocal  
1021 fluorescence microscopy data and conducted phenotypic analysis of *tol* strains and  
1022 associated Western blots of extracts and helped R.K. with strain engineering. P.H., K.R.  
1023 and C.R. collected all NMR data and conducted structure calculations and refinement of  
1024 the TolA-TolB complex. P.H. also conducted all pre-steady state and steady-state  
1025 fluorescence anisotropy experiments and phenotype analysis of TolB mutants. R.K.  
1026 mutated, expressed and purified proteins and engineered all *E. coli* strains for the study.  
1027 F.S. conducted steered molecular dynamics simulations. P.G.I. conducted PALM-SPT  
1028 experiments and undertook all associated analysis of the data. P.R. conducted and  
1029 analysed 3D-SIM data. S.M.M. developed the mathematical model used to fit all FRAP  
1030 data and extract Pal diffusion parameters. C.K. coordinated the experimental strategies  
1031 and drafted the manuscript, with help from S.M.M., J.S., R.K. and C.R.

1032 **Accession numbers**

1033 The coordinates of the family of 20 NMR structures of *P. aeruginosa* TolA-TolB complex  
1034 have been deposited in the Protein Data Bank under accession number 6S3W.  
1035 Resonance assignments for TolA-TolB have been deposited in the BioMagResBank  
1036 (BMRB) under accession number 27397.

1037

1038 **Conflict of interest statement**

1039 The authors declare no competing financial interests nor conflict of interests.

1040

1041 **Data availability statement**

1042 The data supporting the findings of the study are available in the article and its  
1043 Supporting Information or archived in the PDB or available upon request from the  
1044 corresponding author.

1045

1046 **Code availability statement**

1047 The custom Python scripts are available upon request from the corresponding author.

1048

# Figure 1

bioRxiv preprint doi: <https://doi.org/10.1101/790931>; this version posted October 4, 2019. The copyright holder for this preprint (which was not certified by peer review) is the author/funder, who has granted bioRxiv a license to display the preprint in perpetuity. It is made available under aCC-BY 4.0 International license.

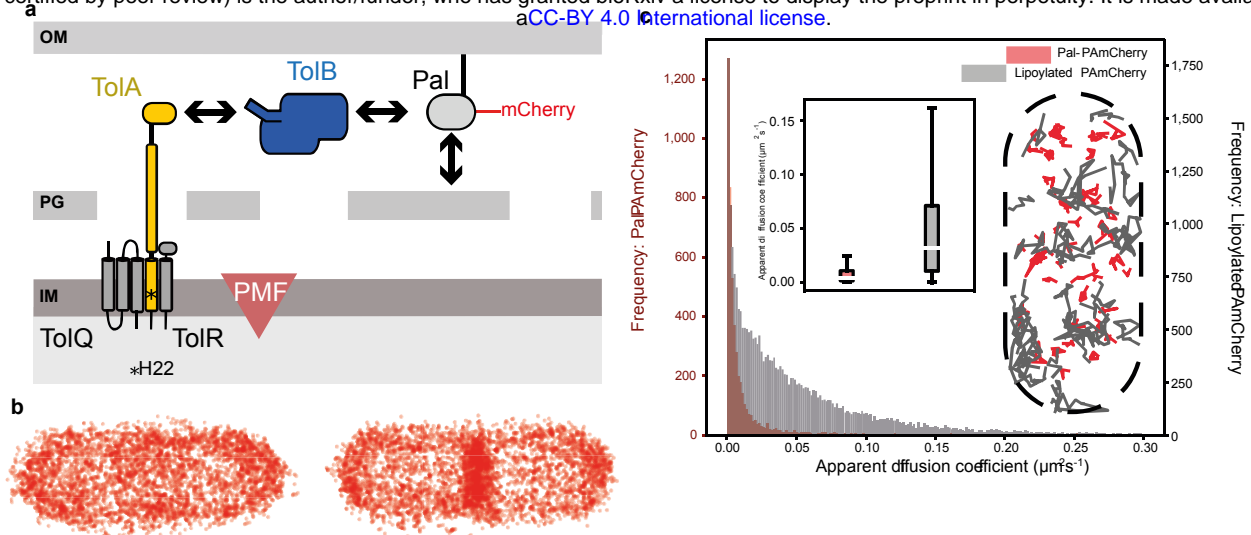

**Figure 1. Interactions with the cell wall slow the diffusion of Pal in the outer membrane of *E. coli*.** **a**, Major components of the Tol system (see text for details). The lipoprotein Pal, labelled with mCherry or PAMCherry (this work), non-covalently associates with the cell wall. Pal also binds to TolB through an interaction that is mutually exclusive of peptidoglycan binding. TolA spans the periplasm and is coupled to the PMF through interactions with two other inner membrane components, TolQ and TolR. The C-terminal domain of TolA interacts with the N-terminus of TolB (see below). Marked with an asterisk in TolA's transmembrane helix is His22, which is essential for PMF coupling. **b**, Pal-PAMCherry distribution in non-dividing (*left-hand panel*) and dividing (*right-hand panel*) *E. coli* cells. Panels show composite single-particle tracking data for 4353 and 4618 molecules in non-dividing and dividing cells, respectively. Data points represent the trajectory centroids of photoactivated Pal-PAMCherry molecules in the outer membrane normalised with respect to the cell. Pal has similarly low mobility in both cell types over the short time-course of these experiments (~350 msec). Notwithstanding this low mobility Pal reorganises during cell division so that its concentration increases by ~50% at mid-cell relative to non-dividing cells. All components of the Tol assembly and the PMF are required for localization of Pal at the divisome (**Supplementary Figure 3**)<sup>10</sup>. **c**, *Main panel*, histogram showing apparent diffusion coefficients ( $D_{app}$ ) for Pal-PAMCherry (*red*) and lipoylated-PAMCherry (*grey*), for clarity diffusion coefficients above  $0.3 \mu\text{m}^2\text{s}^{-1}$  are not shown. Removing the peptidoglycan binding domain of Pal increases  $D_{app}$  at least 8-fold ( $0.0039 \mu\text{m}^2\text{s}^{-1}$ ,  $n = 4900$  tracks compared to  $0.032 \mu\text{m}^2\text{s}^{-1}$ ,  $n = 25446$  tracks in SPT experiments) and mobility in the outer membrane becomes less constrained. *Insert: right*, single particle tracks of Pal-PAMCherry (*red*) and lipoylated-PAMCherry (*grey*) molecules normalised with respect to the cell, a selection of tracks with diffusion coefficients close to their respective medians are displayed. *Insert: left*, Box plots of Pal-PAMCherry and lipoylated-PAMCherry diffusion coefficients (outliers not shown) a two sided students t test with unequal variances indicated a  $p$  value of  $<0.001$ , indicating a significant difference between the two samples. For Pal-PAMCherry (*red*) median values are as stated above, the first and third quartiles are  $0.0014$  and  $0.011 \mu\text{m}^2\text{s}^{-1}$ , respectively. The whiskers represent the most extreme data points that lie within the third quartile +  $1.5x$  the interquartile range and the first quartile -  $1.5x$  the interquartile range:  $0.025$  and  $3.2 \times 10^{-7} \mu\text{m}^2\text{s}^{-1}$ , respectively. For lipoylated-PAMCherry (*grey*) median values are as stated above, the first and third quartiles are  $0.010$  and  $0.071 \mu\text{m}^2\text{s}^{-1}$ , respectively. The whiskers represent the most extreme data points that lie within the third quartile +  $1.5x$  the interquartile range and the first quartile -  $1.5x$  the interquartile range:  $0.16$  and  $5.4 \times 10^{-7} \mu\text{m}^2\text{s}^{-1}$ , respectively.

# Figure 2

bioRxiv preprint doi: <https://doi.org/10.1101/790931>; this version posted October 4, 2019. The copyright holder for this preprint (which was not certified by peer review) is the author/funder, who has granted bioRxiv a license to display the preprint in perpetuity. It is made available under aCC-BY 4.0 International license.

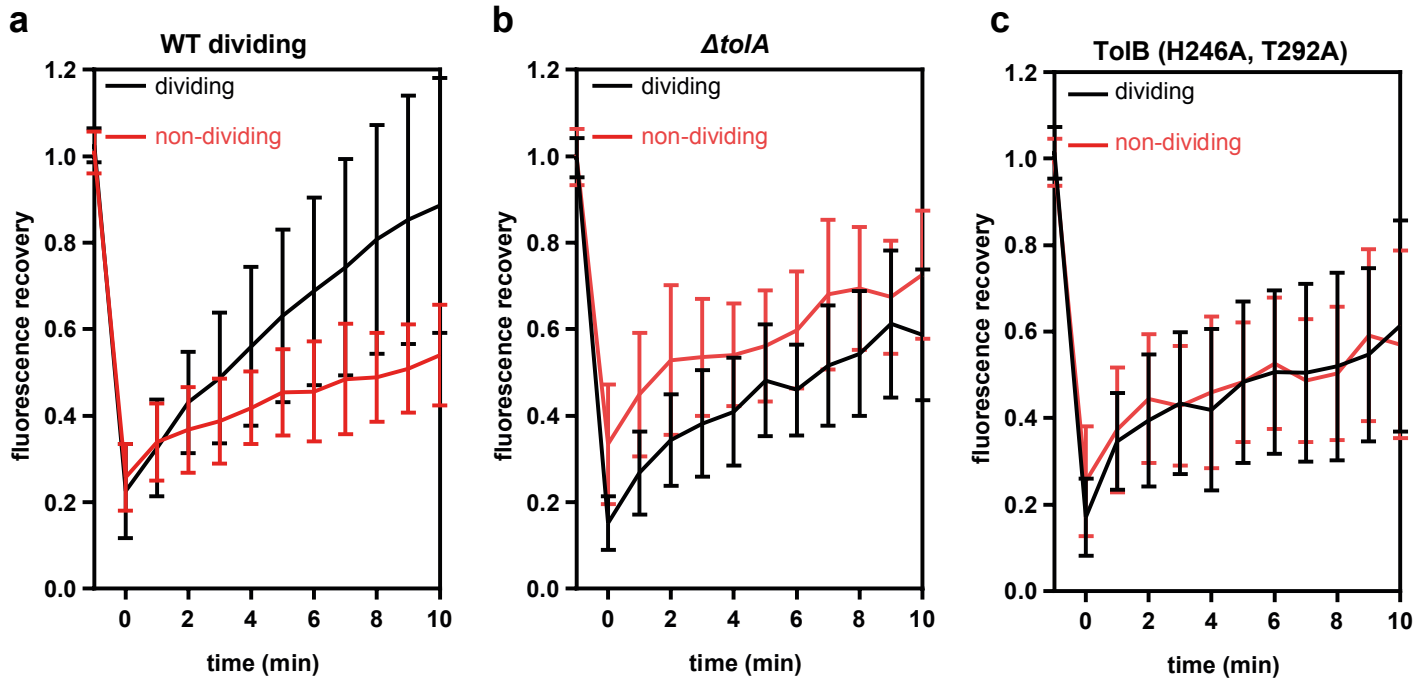

**Figure 2. Fluorescence recovery after photobleaching (FRAP) data for wild-type and mutant *E. coli* cells.** Fluorescence recovery curves of dividing and non-dividing cells after bleaching a rectangular area at the septum or mid-cell of non-dividing cells. All experiments were carried out at 37°C. Recovery was monitored for 10 min post-bleach. Recovery curves are an average from 30 cells, with bars representing standard deviation. **a**, Wild-type dividing cells were able to slowly recover the fluorescence to higher level compared to non-dividing cells (~80% and ~60%, respectively). See text for details. **b**, FRAP recovery curves of Pal-mCherry fluorescence in dividing and non-dividing cells of a *tolA* deletion strain. **c**, FRAP recovery curves of Pal-mCherry fluorescence in dividing and non-dividing cells of a TolB mutant strain (TolB H246A T292A) where TolB is unable to bind Pal. In this instance, cephalixin (50  $\mu\text{g}/\mu\text{l}$ ) was added to elongate non-dividing cells which were otherwise too small for FRAP analysis.

# Figure 3

bioRxiv preprint doi: <https://doi.org/10.1101/790931>; this version posted October 4, 2019. The copyright holder for this preprint (which was not certified by peer review) is the author/funder, who has granted bioRxiv a license to display the preprint in perpetuity. It is made available under aCC-BY 4.0 International license.

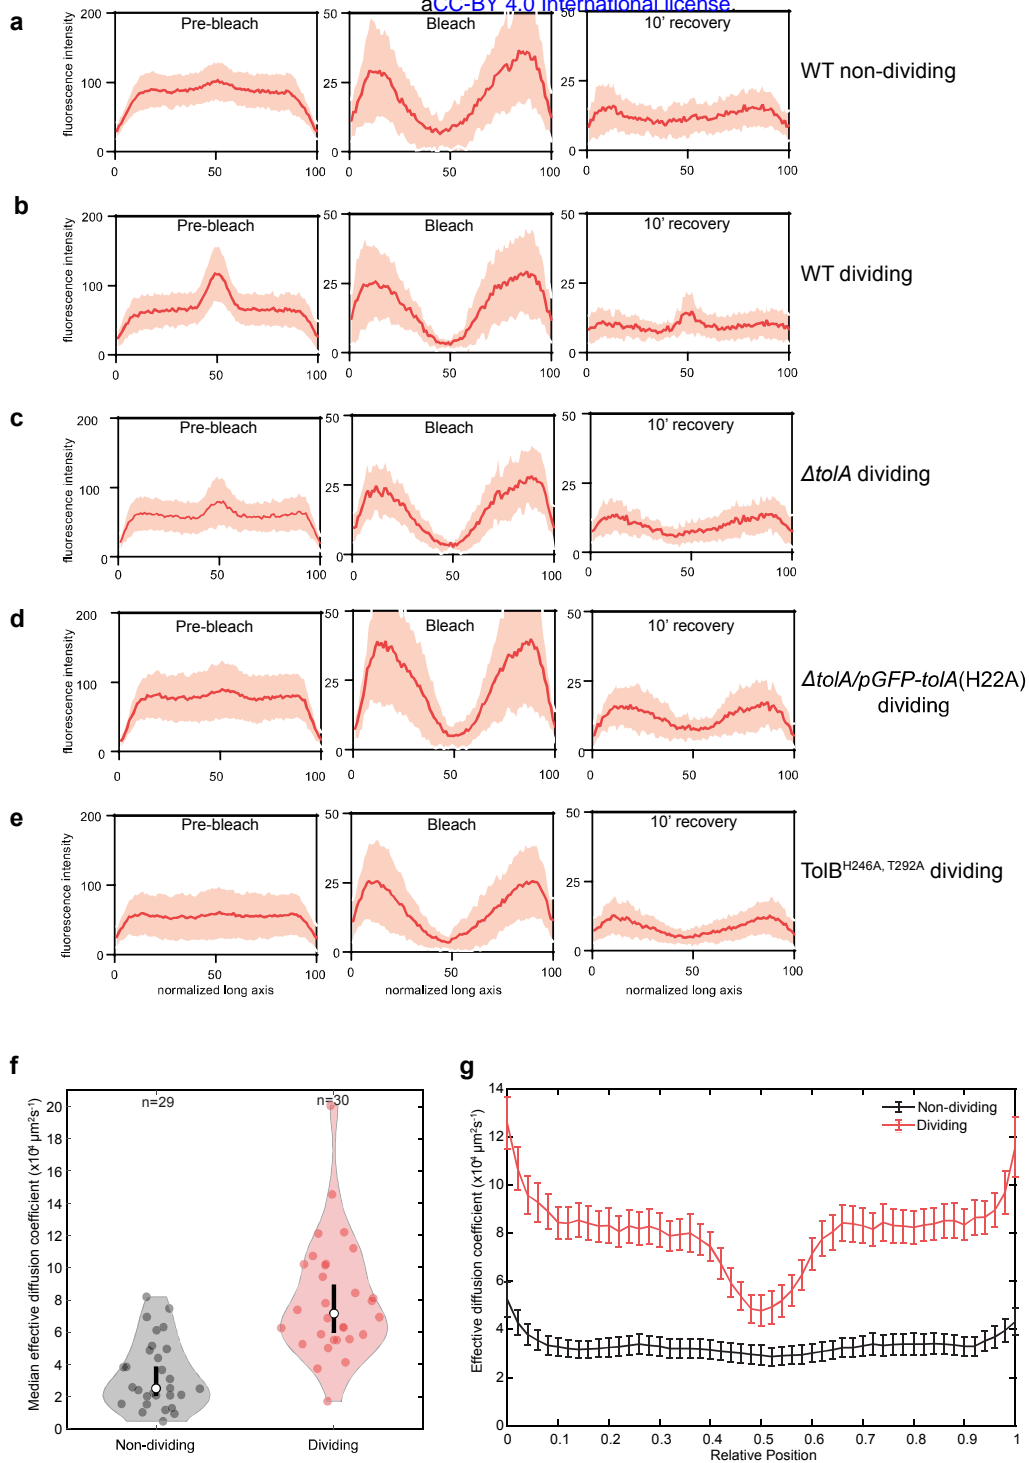

**Figure 3. Pal dynamics in dividing and non-dividing *E. coli* cells.** Panels **a-e** show longitudinal fluorescence distributions derived from FRAP data (**Figure 2**). *Left panels*: cell before bleach. *Middle panels*: cells after bleach. *Right panels*: cells after 10 min recovery. **a**, Wild-type non-dividing cells. **b**, Wild-type dividing cells. **c**, *tolA* deletion strain, dividing cells. **d**, TolA H22A strain, dividing cells. **e**, TolB H246A T292A strain, dividing cells. Only in the case of wild-type dividing cells does Pal-mCherry accumulation at the septum recover. **f**, Violin plots showing the median effective diffusion coefficient ( $D_{eff}$ ) for Pal-mCherry in all non-dividing and dividing *E. coli* cells calculated from FRAP data as described in the text. Dividing cells show a greater variance in  $D_{eff}$  than non-dividing cells. The black line indicates the 95% confidence interval. **g**, The mean  $D_{eff}$  of Pal-mCherry as a function of cellular location in non-dividing and dividing cells obtained from FRAP data. Pal diffusion increases in dividing cells except at the septum where its mobility is similar to that in non-dividing cells. Bars indicate standard error.  $n = 29$  or  $30$  cells.

# Figure 4

bioRxiv preprint doi: <https://doi.org/10.1101/790931>; this version posted October 4, 2019. The copyright holder for this preprint (which was not certified by peer review) is the author/funder, who has granted bioRxiv a license to display the preprint in perpetuity. It is made available under aCC-BY 4.0 International license.

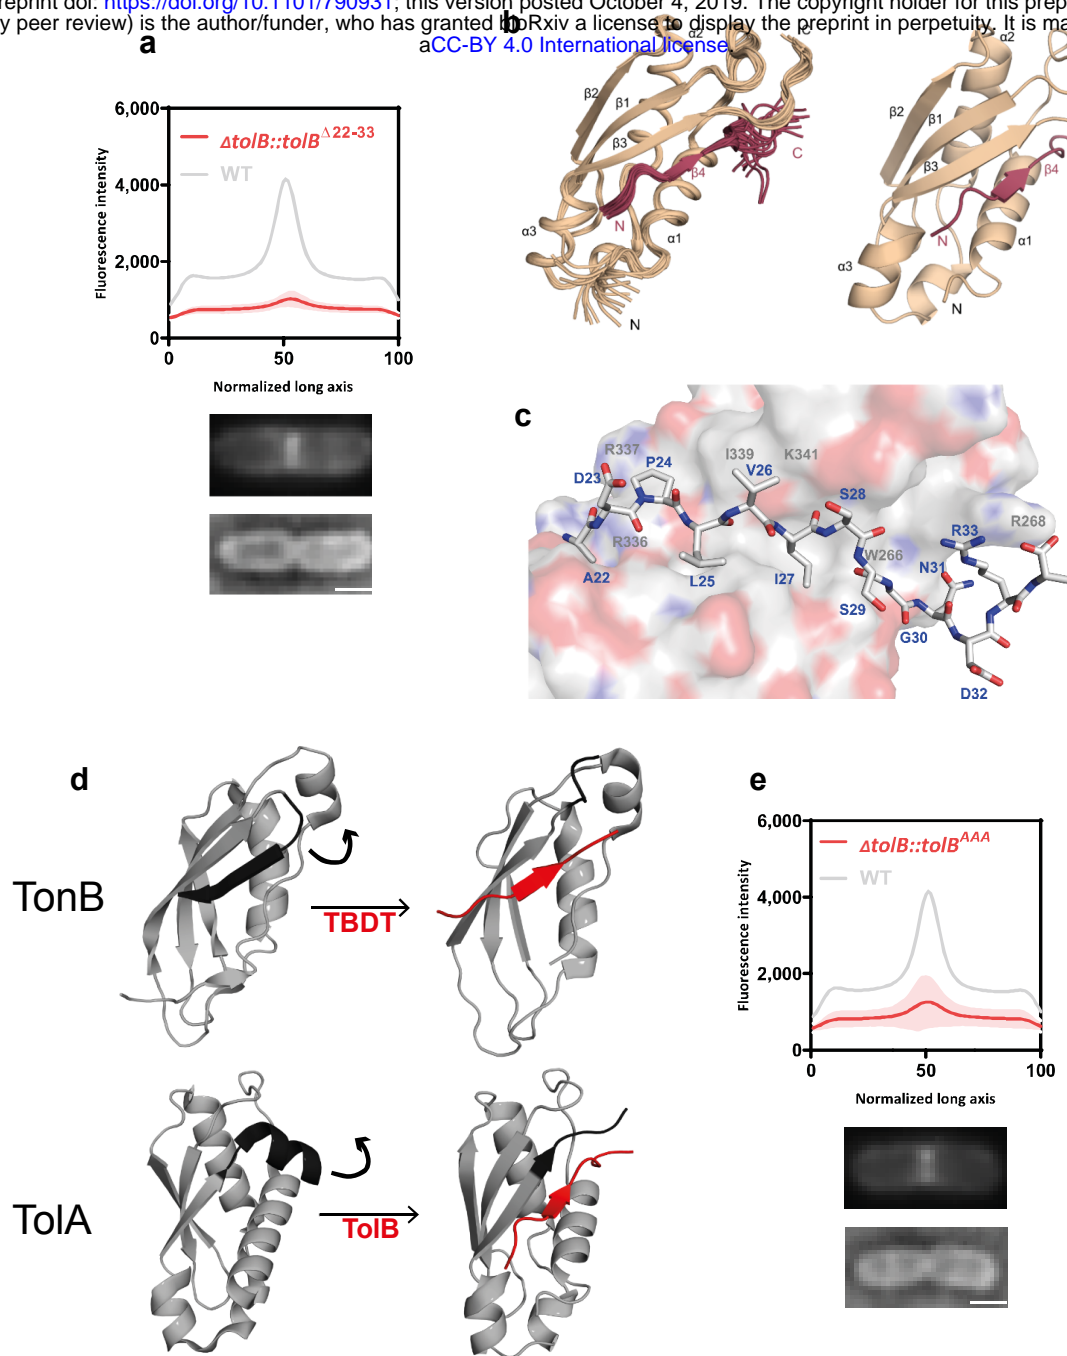

**Figure 4. The structure of the TolA-TolB complex suggests a role in force transduction.** **a**, Average distribution of Pal-mCherry along the normalized x-axis of *E. coli* cells expressing mutant TolB from its native locus. Deletion of TolB's N-terminus (residues 22-33) abolishes Pal-mCherry accumulation at the septum. The curve is an average from 30 cells, with shaded area representing standard deviation. *Below*: representative TIRFM and brightfield images of cells. Scale bar, 1  $\mu$ m. **b**, Solution-state NMR structure of the C-terminal domain of TolA (residues 224-347, beige) in complex with the N-terminus of TolB (the TolA box; residues 22ADPLVISSGNDRA34; red) from *P. aeruginosa*. See **Supplementary Table 1** for full list of NMR restraints and refinement statistics. The first 23 residues of TolA (224-247) are unstructured in this complex and are not represented in the figure. *Left hand panel*, overlay of the 20 lowest energy structures for the complex. Pairwise root mean squared deviation (rmsd) for the ensemble was  $1.03 \pm 0.12$  Å. *Right hand panel*, average ensemble structure for the complex. TolB<sup>22-34</sup> binds by  $\beta$ -strand augmentation, forming a parallel  $\beta$ -strand with TolA. **c**, TolB<sup>22-34</sup>, stick representation, binds to a cleft on the TolA surface. Hydrophobic residues in TolB play a prominent role in stabilising the complex (in particular Leu25, Val26 and Ile27). **d**,  $\beta$ -strand augmentation is at the heart of both Ton and Tol complexes. Figure shows a comparison of a TonB-TBDT complex<sup>69</sup> with TolA-TolB (present work). Complex formation in both cases requires a C-terminal element of secondary structure be displaced in order for a parallel  $\beta$ -strand to form. A structural overlay of the resulting complexes has an rmsd of 2.2 Å. **e**, Alanine-substitution of the three key hydrophobic residues in *E. coli* TolB (Ile25Ala, Val26Ala, Ile27Ala; TolB<sup>AAA</sup>) abolishes Pal-mCherry accumulation at the septum of dividing cells. The fluorescence distribution shown is an average from 30 cells, with shaded area depicting standard deviation. Representative TIRFM and brightfield images of cells are shown below the fluorescence data. Scale bar, 1  $\mu$ m.

# Figure 5

bioRxiv preprint doi: <https://doi.org/10.1101/790931>; this version posted October 4, 2019. The copyright holder for this preprint (which was not certified by peer review) is the author/funder, who has granted bioRxiv a license to display the preprint in perpetuity. It is made available under aCC-BY 4.0 International license.

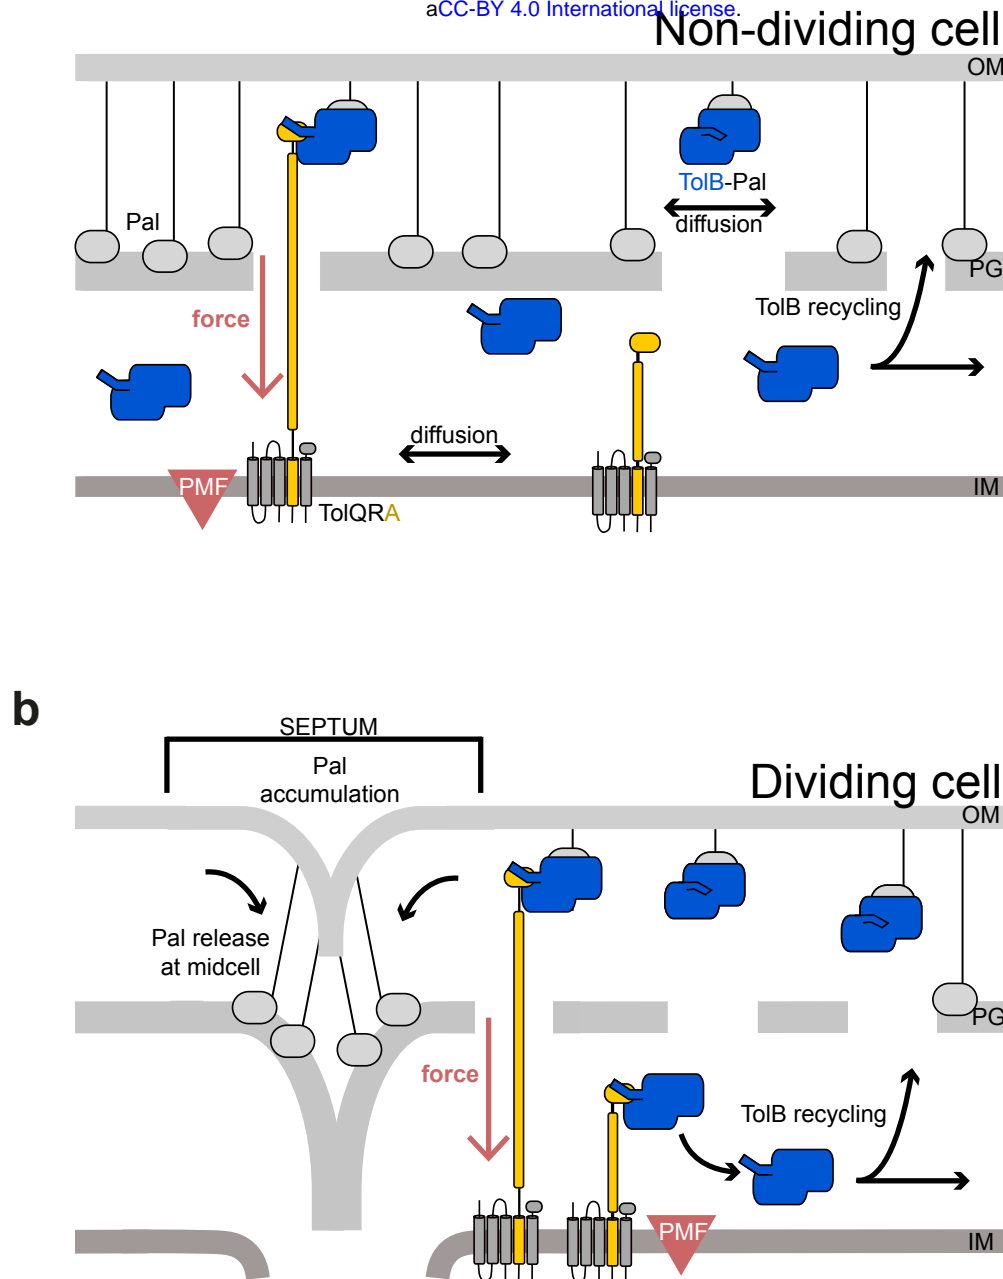

**Figure 5. Mobilisation-and-capture of Pal by the Tol assembly drives active Pal accumulation at division sites.**

The following model views the periplasm as divided into two compartments separated by a porous peptidoglycan cell wall; the 'outer periplasm' is close to the outer membrane while the 'inner periplasm' is close to the inner membrane. **a, Non-dividing cells.** In this state, TolQ-TolR-TolA is free to diffuse in the inner membrane. Periplasmic TolB enhances Pal mobility by blocking Pal's association with peptidoglycan, but also marks the complex for active dissociation by TolQ-TolR-TolA via the N-terminus of TolB. We propose that TolA pulls TolB through the holes that exist in the peptidoglycan layer to the inner periplasm. Thereafter, TolB diffuses back through the peptidoglycan to the outer periplasm to repeat the process. Notwithstanding this recycling, however, Pal is predominantly free of TolB in non-dividing cells and therefore bound to the peptidoglycan layer, slowing its diffusion. **b, Dividing cells.** The TolQ-TolR-TolA complex is recruited to the divisome which localizes its TolB capturing activity. This leads to an overall lowering of the level of TolB transduction through the peptidoglycan layer and consequently greater numbers of TolB molecules in the outer periplasm and as a result greater Pal mobility throughout the cell, except at the septum. Septal Pal is kept free of TolB by localized TolQ-TolR-TolA. As TolB-Pal complexes diffuse past the septum they are actively dissociated, releasing Pal. TolB is recycled to mobilise other Pal molecules away from the septum. Hence, only in dividing cells do the small number of TolBs enhance the mobility of a much larger population of Pal molecules, TolB acting essentially as an amplifier. The end result is that more and more Pal molecules become sequestered at the divisome where they stabilize the link between the OM and the underlying cell wall in daughter cells.

# Figure supplemental 1

bioRxiv preprint doi: <https://doi.org/10.1101/2019.09.24.311571>; this version posted October 4, 2019. The copyright holder for this preprint (which was not certified by peer review) is the author/funder, who has granted bioRxiv a license to display the preprint in perpetuity. It is made available under aCC-BY 4.0 International license.

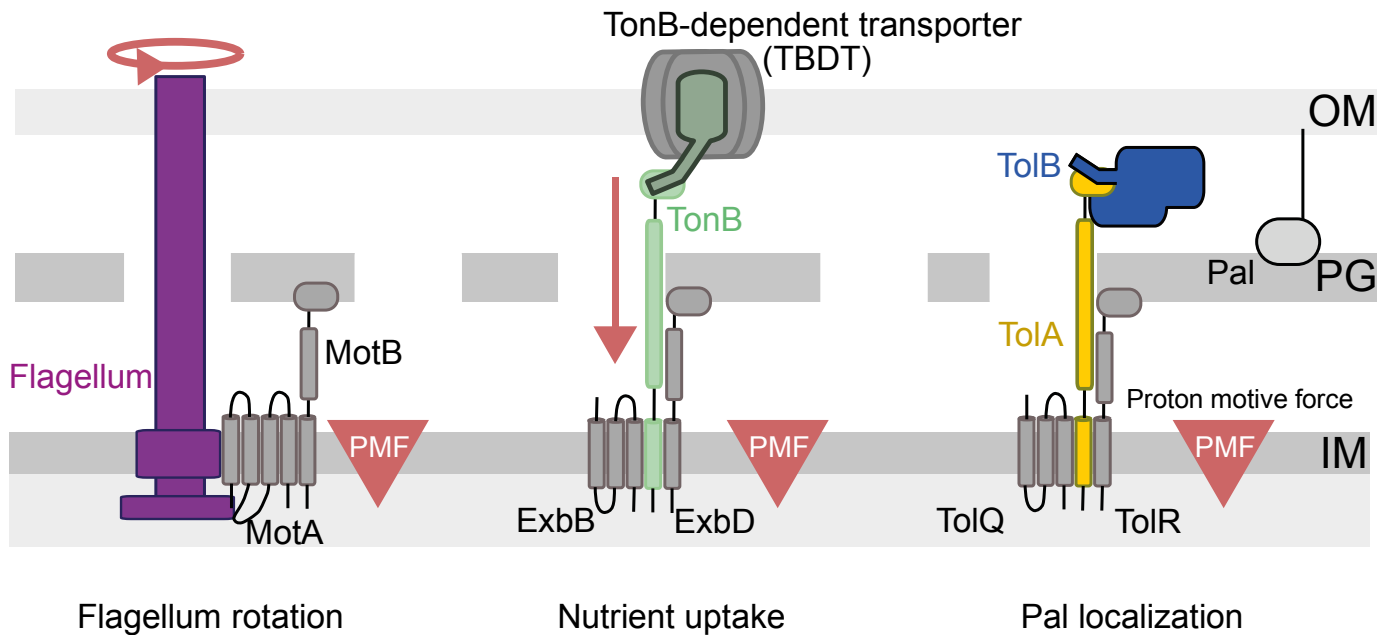

**Supplementary Figure 1. Schematic illustrating the comparative PMF-harvesting components of Tol with Ton and the flagellum all of which span the bacterial cell envelope.** All three systems have related PMF-harvesting proteins in the inner membrane – TolQ and TolR in Tol, ExbB and ExbD in Ton and MotA and MotB in the flagellum – and conserved transmembrane residues couple the PMF to mechanical motion (not depicted). In the case of the bacterial flagellum, multiple MotA/MotBs are recruited to drive rotation of the flagellum<sup>70</sup>. In the case of Ton, TonB is activated by the PMF through ExbB and ExbD to displace the plug domains of ligand-bound TBDTs, which typically transport iron siderophore complexes or vitamin B12 into the periplasm<sup>25</sup>. Contact with the TBDT is through a TonB box sequence at the N-terminus of the TBDT that interacts with the C-terminal domain of TonB close to the outer membrane. In the case of Tol, TolQ and TolR cause PMF-mediated conformational changes to TolA, which in turn interacts with the N-terminus of TolB<sup>18</sup>.



# Figure supplemental 2

bioRxiv preprint doi: <https://doi.org/10.1101/195931>; this version posted October 4, 2019. The copyright holder for this preprint (which was not certified by peer review) is the author/funder, who has granted bioRxiv a license to display the preprint in perpetuity. It is made available under aCC-BY 4.0 International license.

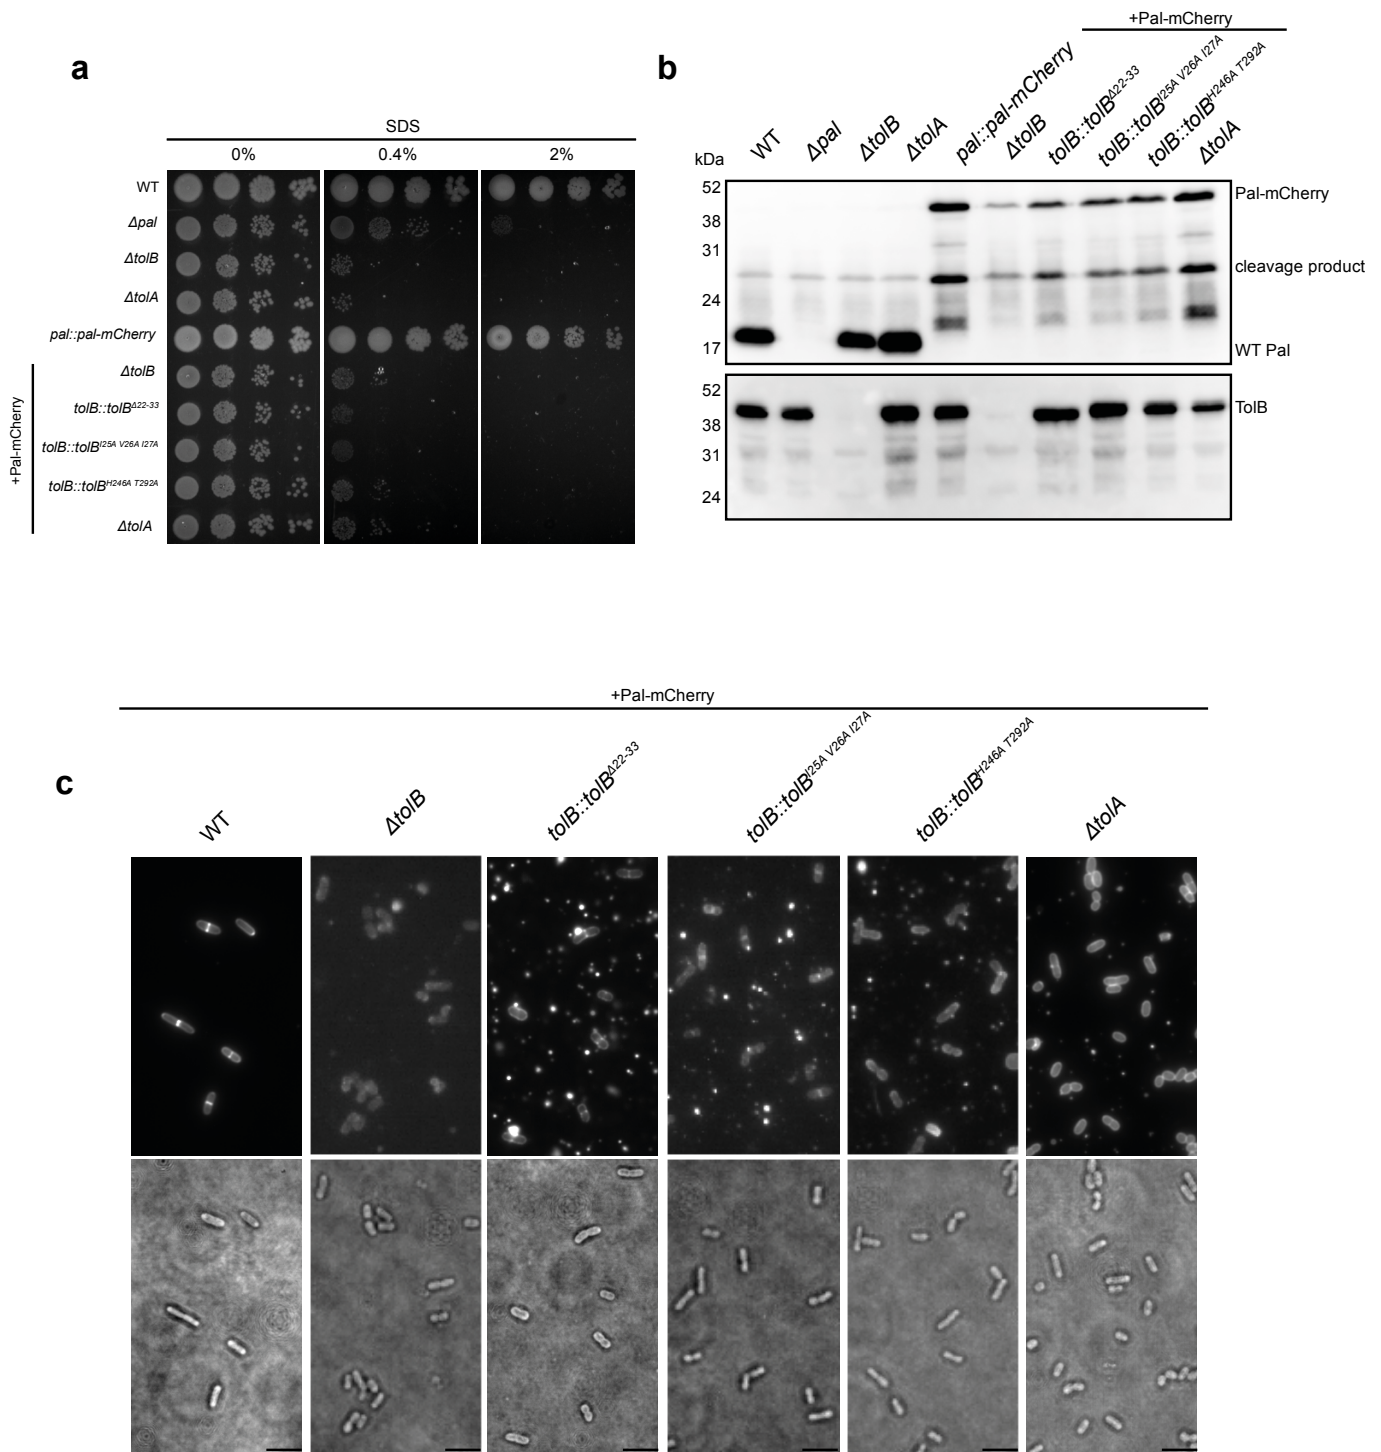

**Supplementary Figure 2. *E. coli* phenotypes of engineered strains and expression levels of Pal.** **a**, Representative images from OM stability assays. Cultures were grown at 37°C, serially diluted in fresh LB medium, pipetted onto LB plates containing 0, 0.4 and 2% SDS and grown overnight at 37°C. Experiments were repeated three times (representative image shown from one experiment). Only wild-type (WT) and complemented Pal-mCherry strains show growth on 2% SDS. **b**, Representative Western blots probed with anti-Pal or anti-TolB antibodies. mCherry protein is cleaved at the chromatophore which after sample denaturation results in two bands on the Western blot; full-length Pal-mCherry and Pal linked to the cleaved C-terminus of mCherry. This cleavage does not impact the fluorescence in native conditions<sup>71</sup>. All *tolB* mutants show lower protein levels of Pal. **c**, Representative images of TIRFM fields of view of the strains used in this work. Outer membrane vesicles (OMVs) are evident for *tol* mutants where they appear as fluorescent vesicles amongst cells. OMV production has long been associated with mutations in the Tol assembly<sup>72</sup>. Contrast/brightness levels are set individually for each image. Scale bar, 5  $\mu$ m.

# Figure supplemental 3

bioRxiv preprint doi: <https://doi.org/10.1101/790931>; this version posted October 4, 2019. The copyright holder for this preprint (which was not certified by peer review) is the author/funder, who has granted bioRxiv a license to display the preprint in perpetuity. It is made available under aCC-BY 4.0 International license.

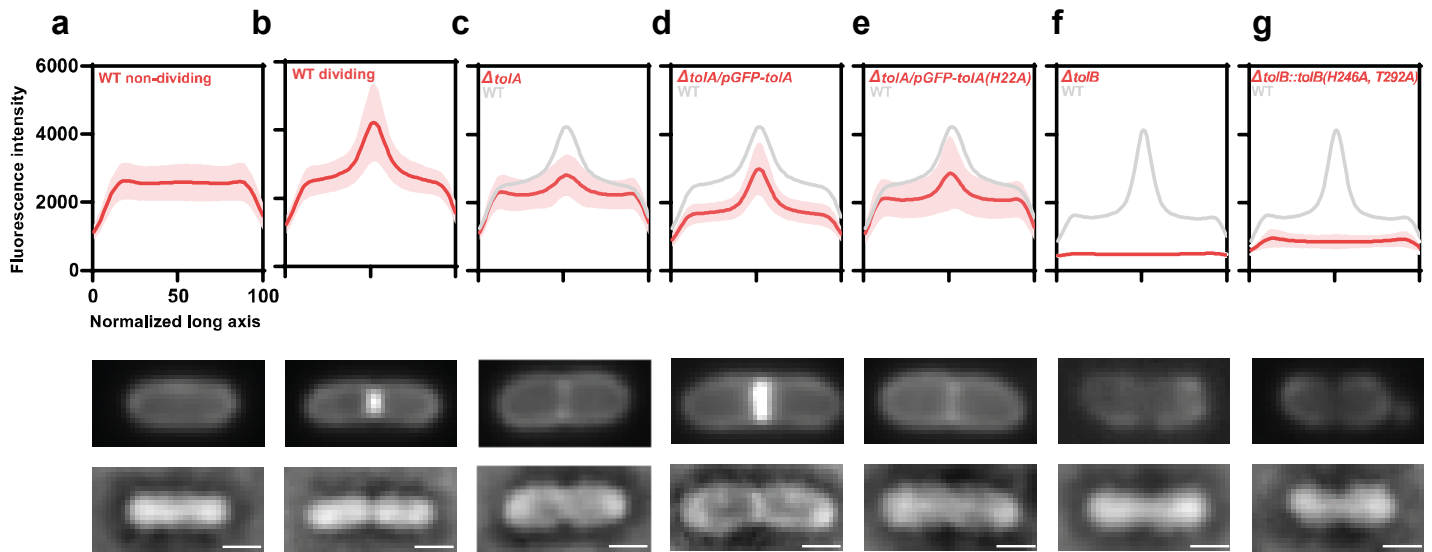

**Supplementary Figure 3. Pal-mCherry distribution profiles in wild-type and *tol* mutant *E. coli* cells.** Average distribution of Pal-mCherry along the normalized x-axis of the cells. In each case, curves are averages from 30 cells, with shaded areas representing the standard deviation. Representative TIRFM and brightfield images of dividing cells are shown beneath each set of data. Contrast/brightness levels are set individually for each image. Scale bar throughout, 1  $\mu$ m. **a**, Wild-type non-dividing cells. The peripheral distribution of the Pal-mCherry fluorescence in non-dividing cells is consistent with the periplasmic location of Pal. **b**, Wild-type dividing cells. **c**, *tolA* deletion strain. **d**, *tolA* deletion strain expressing GFP-TolA from an IPTG-inducible plasmid. **e**, *tolA* strain expressing GFP-TolA with H22A mutation that decouples TolA from the PMF. **f**, *tolB* deletion strain. **g**, *tolB* strain expressing chromosomal TolB with mutations in H246A and T292A that abolish TolB binding to Pal.

# Figure supplemental 4

bioRxiv preprint doi: <https://doi.org/10.1101/790931>; this version posted October 4, 2019. The copyright holder for this preprint (which was not certified by peer review) is the author/funder, who has granted bioRxiv a license to display the preprint in perpetuity. It is made available under aCC-BY 4.0 International license.

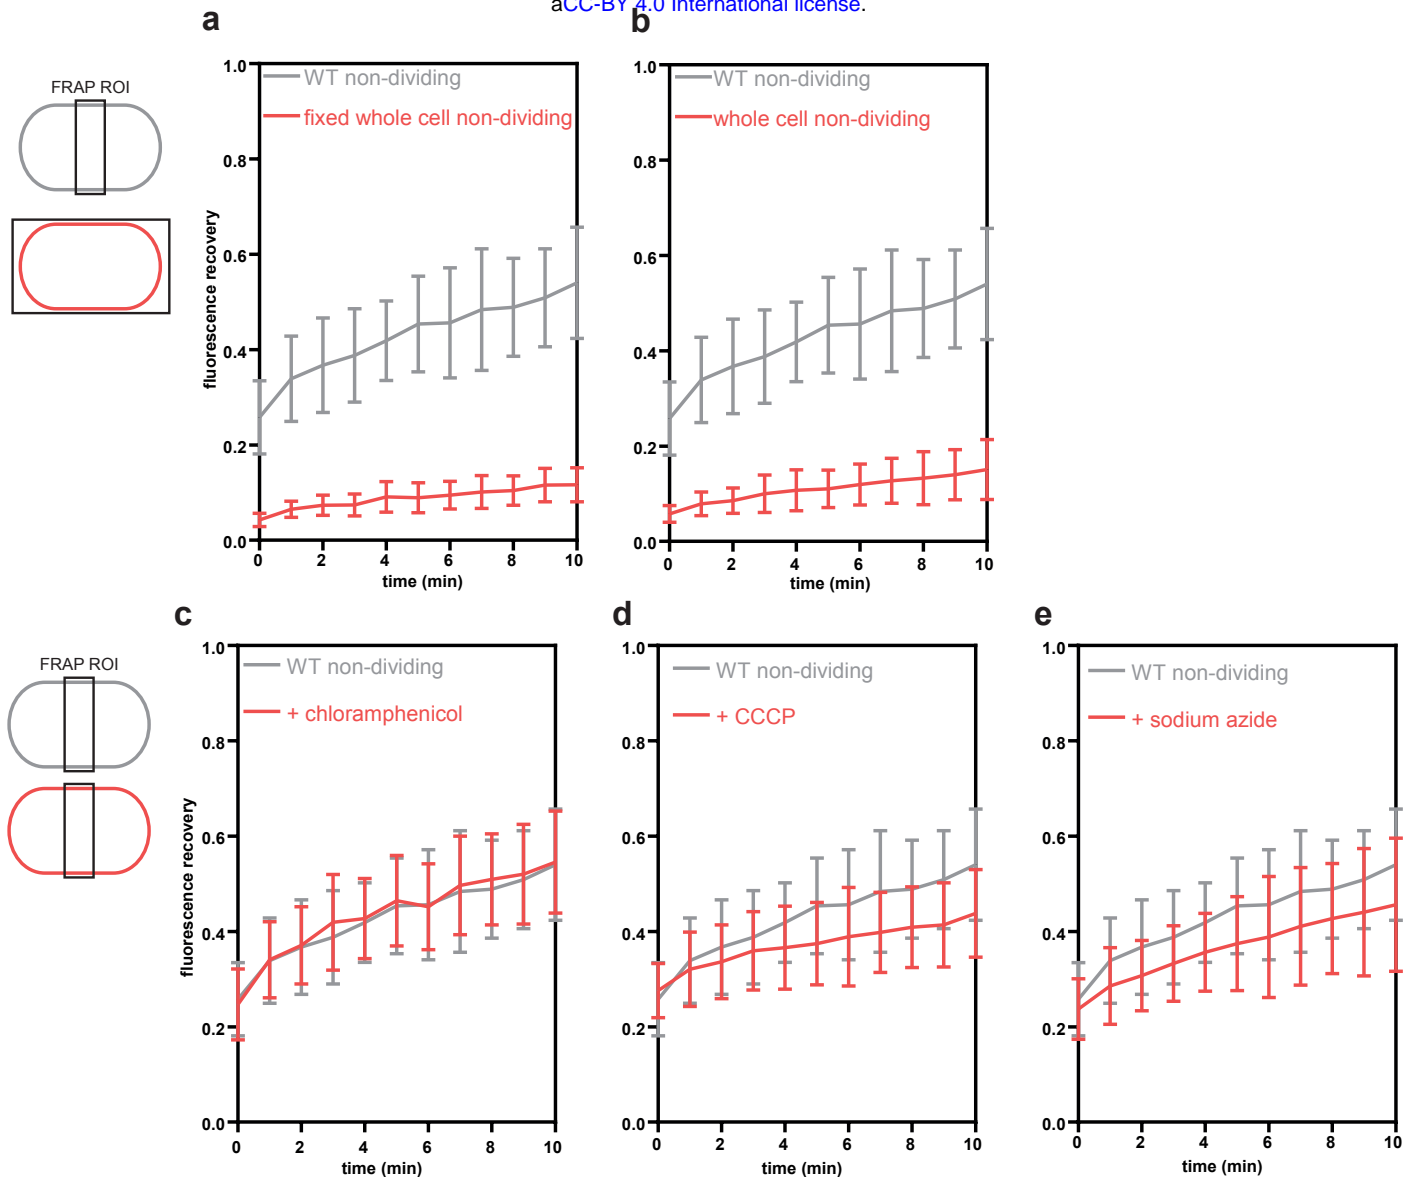

**Supplementary Figure 4. Biogenesis of Pal and mCherry photoswitching have a small effect on fluorescence recovery in FRAP experiments.** Due to the long timescale of the FRAP experiments the observed fluorescence recovery in our experiments may be influenced by Pal synthesis, its insertion in the OM and/or fluorophore switching back to its fluorescent state. **a**, To assess the impact of mCherry photoswitching, formaldehyde-fixed non-dividing cells were bleached, and their fluorescence recovery was normalized to a non-bleached cell acquired in the same field of view. As a control, live non-dividing cells were also bleached in the rectangular region of interest set at the mid-cell. **b**, Live non-dividing cells were bleached as described above. The levels of recovery suggest that Pal-mCherry biogenesis and Pal insertion in the OM make a relatively minor contribution to FRAP data. **c**, To address the issue of Pal biogenesis on recovery curves, non-dividing cells were treated with 30  $\mu\text{g}/\mu\text{l}$  of chloramphenicol and bleached at mid-cell. The recovery was identical to that of untreated cells. **d and e**, Addition of CCCP (0.1 mM) or sodium azide (50  $\mu\text{g}/\mu\text{l}$ ) had a measurable effect on FRAP recovery curves suggesting biogenesis/secretion impact fluorescence recovery in our FRAP experiments data but that their contributions are relatively minor. These factors account for a quarter of the observed recovery in live cells, which reiterates that the bulk of Pal-mCherry fluorescence recovery in FRAP experiments is due to slow Pal mobility in the OM of *E. coli*. In all experiments, recovery curves are an average from 30 cells, with bars representing standard deviation.

# Figure supplemental 5

bioRxiv preprint doi: <https://doi.org/10.1101/790931>; this version posted October 4, 2019. The copyright holder for this preprint (which was not certified by peer review) is the author/funder, who has granted bioRxiv a license to display the preprint in perpetuity. It is made available under aCC-BY 4.0 International license.

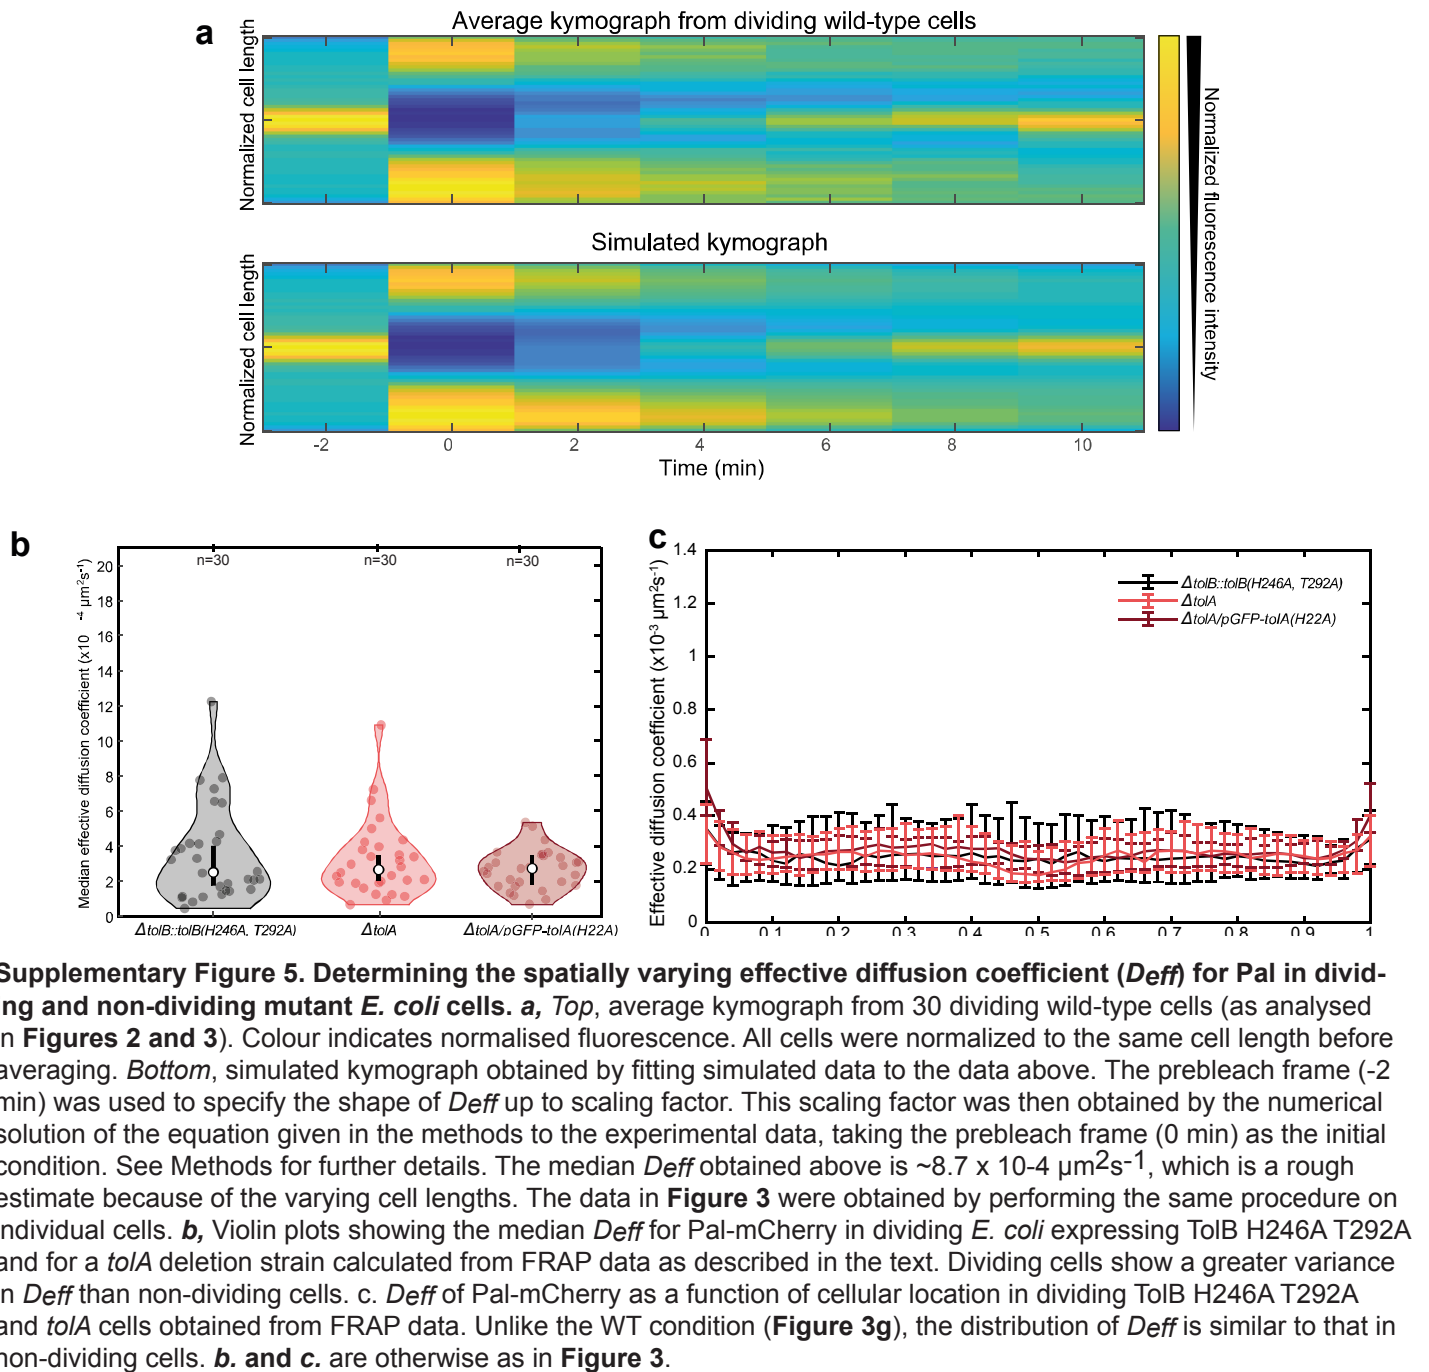

# Figure supplemental 6

bioRxiv preprint doi: <https://doi.org/10.1101/790931>; this version posted October 4, 2019. The copyright holder for this preprint (which was not certified by peer review) is the author/funder, who has granted bioRxiv a license to display the preprint in perpetuity. It is made available under aCC-BY 4.0 International license.

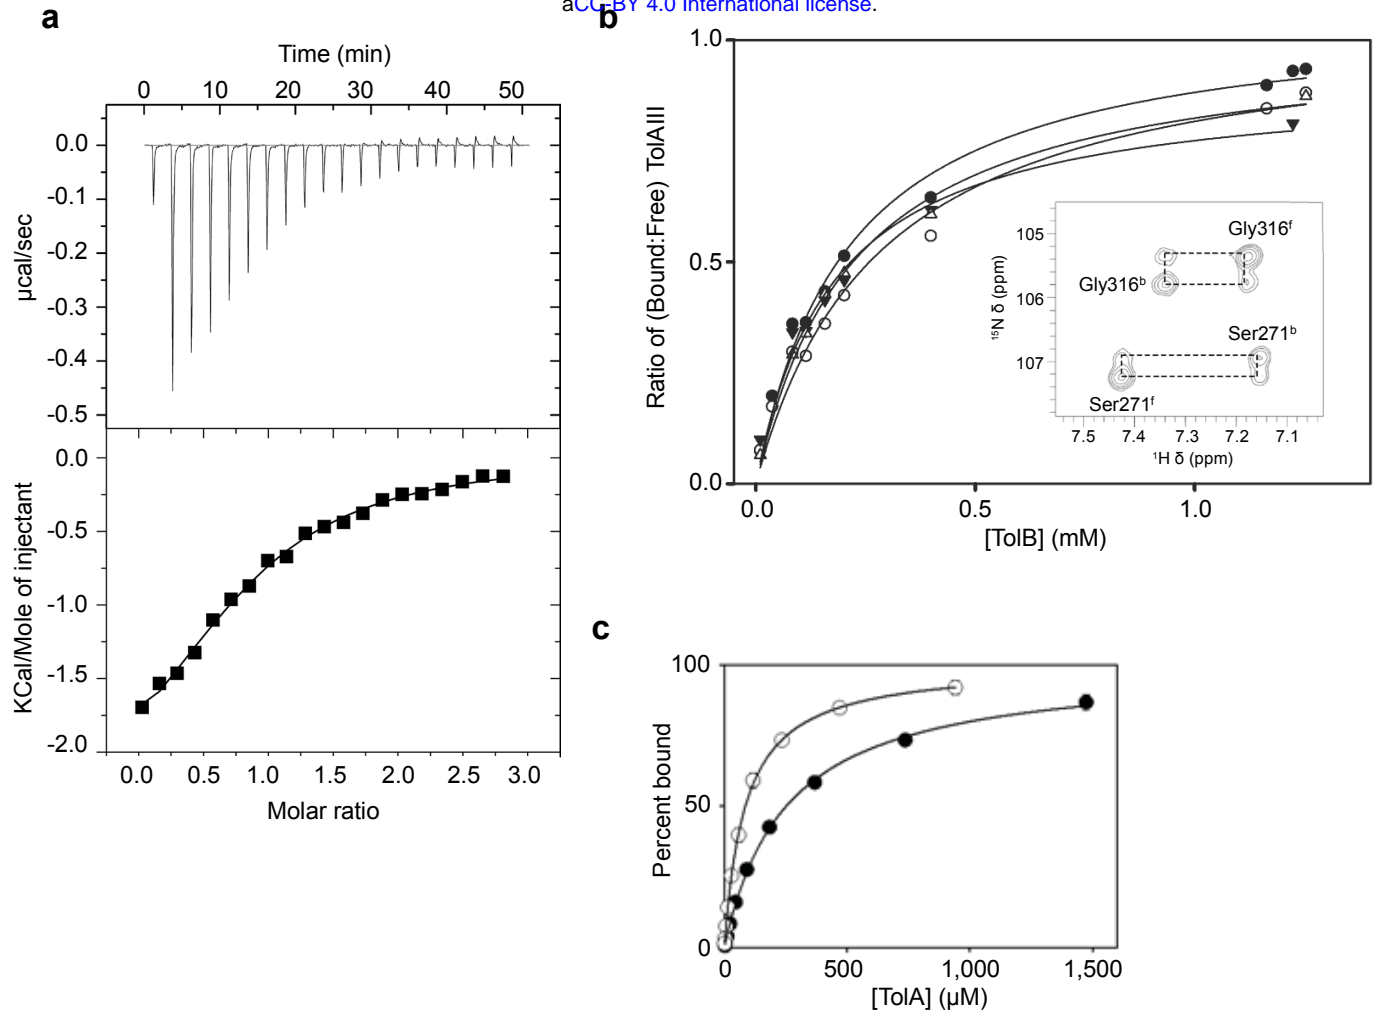

**Supplementary Figure 6. The N-terminus of ToIB binds weakly to the C-terminal domain of ToIA.** **a**, ITC data of *E. coli* ToIA C-terminal domain (cell concentration, 150  $\mu\text{M}$ ) dissolved in 50 mM Hepes, 50 mM NaCl, pH 7.5, into which was injected a 12-residue ToIB peptide (ToIB<sup>22-33</sup>; syringe concentration, 2 mM) at 25°C, using a iTC200 instrument (Microcal/GE Healthcare). From three independent measurements, average values for  $\Delta H$  -3.79 ( $\pm 1.71$ ) kcal.mol<sup>-1</sup>,  $\Delta S$  +5.91 ( $\pm 6.84$ ) cal.K<sup>-1</sup> mol<sup>-1</sup>,  $N = 0.56$  ( $\pm 0.23$ ) and  $K_D = 44$  ( $\pm 23.5$ )  $\mu\text{M}$  were obtained. These data are comparable to those reported previously by<sup>18</sup> for intact ToIB binding ToIA under the same conditions with the exception that here ToIB binding is enthalpically driven. These experiments demonstrate that the entire ToIA-binding region is contained within the N-terminus of ToIB and hence can be used in the form of an isolated peptide. As detailed below, we were unable to determine the structure for the *E. coli* complex and so switched to the equivalent complex from *P. aeruginosa* (binding was too weak to determine the  $K_D$  by ITC for this complex). **b**, Binding of ToIB<sup>22-34</sup> to the C-terminal domain of <sup>15</sup>N-labelled ToIA (residues 224-347) 0.6 mM from *P. aeruginosa* followed by changes in <sup>1</sup>H, <sup>15</sup>N-HSQC spectra in 20 mM phosphate buffer, 100 mM NaCl at pH 7.6. At 95% saturation, >80% of all ToIA peaks were perturbed by ToIB<sup>22-33</sup> binding. Every peak was in slow chemical exchange hence the ratio of the bound and unbound peak volumes corresponds to the ratio of bound/free ToIA for each concentration of ToIB. The inset shows a portion of a ZZ-exchange HSQC spectrum of a mixture of bound (68%) and free (32%) ToIA. The peaks for Ser271 and Gly316 in the bound (b) and free (f) states are labeled; the additional peaks observed arise from exchange between the bound and free states of ToIA and confirm the assignment of the bound and free peaks to the same amino acid residue. The titration curves for Ser271, Ser306, Gly316 and Leu347 in ToIA were fitted by non-linear regression in SigmaPlot to obtain the  $K_D$ . Average  $K_D$  from these fits was 220  $\mu\text{M} \pm 30 \mu\text{M}$  ( $n=4$  residues), which is over five-fold weaker binding than the *E. coli* complex. **c**, Fluorescence anisotropy binding curves for *P. aeruginosa* ToIB<sup>22-33</sup> binding the C-terminal domain of ToIA. Increasing concentrations of ToIA were titrated into 1  $\mu\text{M}$  ToIB<sup>22-33</sup> peptide labelled at its C-terminus (via an additional lysine residue) with fluorescein isothiocyanate (FITC) in 50 mM Tris 100 mM NaCl pH 7.0 at 25°C,  $\lambda_{\text{ex}}$  495 nm and  $\lambda_{\text{em}}$  519 nm. Fluorescence polarization was recorded in a Fluoromax-4 spectrofluorimeter (Horiba JobinYvon). Binding curves were fitted using non-linear regression in SigmaPlot. Closed symbols, wild-type ToIA (residues 224-347),  $K_D = 250 \mu\text{M} \pm 10 \mu\text{M}$  ( $n = 3$ ), which is in reasonable agreement with the NMR titration data shown in **b**. Open symbols, ToIA (residues 224-344) lacking its short C-terminal  $\alpha$ -helix,  $K_D = 86 \mu\text{M} \pm 3 \mu\text{M}$  ( $n = 3$ ). Deletion of the ToIA helix improves ToIB binding three-fold.

# Figure supplemental 7

bioRxiv preprint doi: <https://doi.org/10.1101/790931>; this version posted October 4, 2019. The copyright holder for this preprint (which was not certified by peer review) is the author/funder, who has granted bioRxiv a license to display the preprint in perpetuity. It is made available under aCC-BY 4.0 International license.

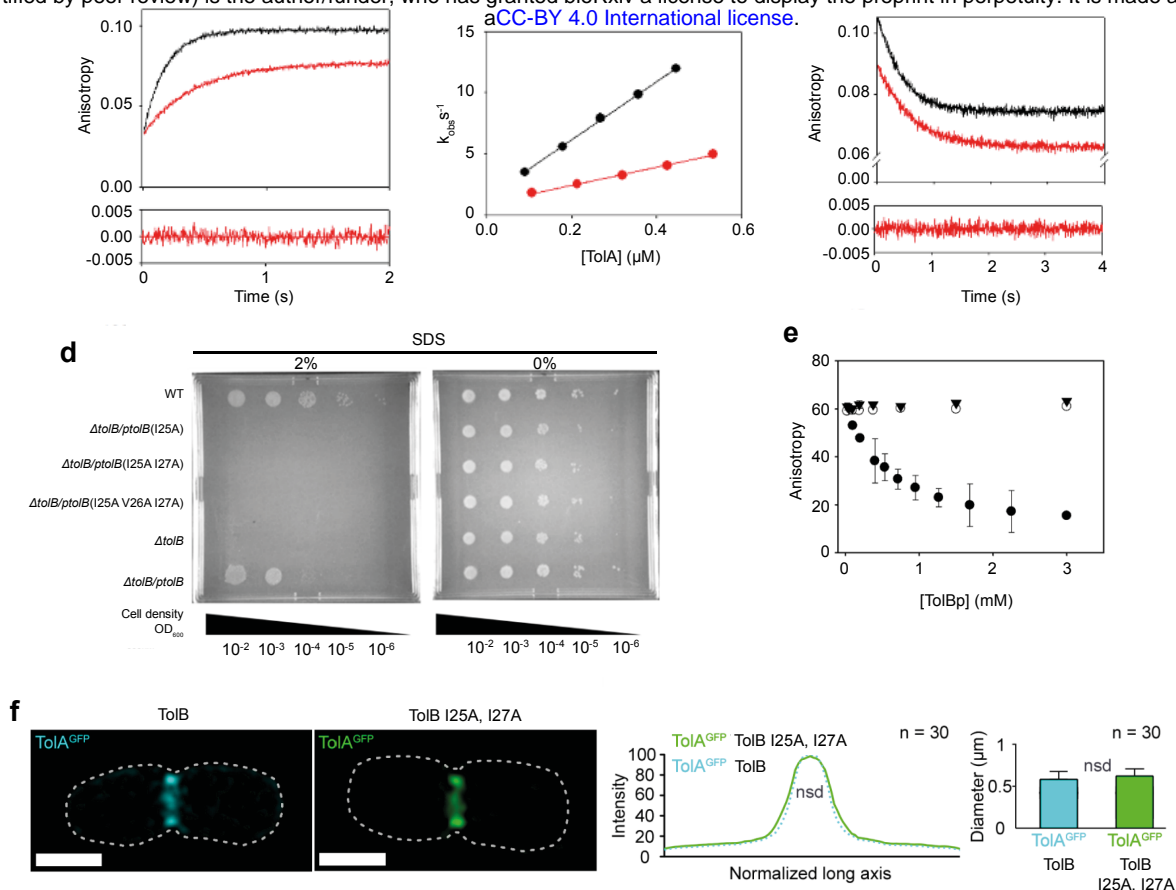

**Supplementary Figure 7. Kinetic and thermodynamic measurements of the TolA-TolB interaction and the impact of mutations in vitro and in vivo** in vitro measurements used the *P. aeruginosa* complex while all in vivo assays used *E. coli*. **a**, Pseudo-first-order stopped-flow fluorescence anisotropy traces for *P. aeruginosa* FITC-labelled TolB22-33 (1 μM) binding a 100-fold excess of the C-terminal domain of wild-type TolA (red trace) and TolA with its C-terminal α-helix removed (black trace) in 50 mM Tris 100 mM NaCl pH 7.0 and at 25°C. Time dependence of the fluorescence polarization of FITC ( $\lambda_{ex}$  470 nm,  $\lambda_{em}$  515 nm) was monitored and fitted to a single exponential equation yielding an observed rate ( $k_{obs}$ ). Residuals to one such fit are shown below. **b**, Association rate constants ( $k_{on}$ ) for wild-type TolA-TolB22-33 complex (red) and truncated TolA (black) were obtained from the concentration dependence of  $k_{obs}$ . All data points were determined in triplicate (error bars within the data symbols).  $k_{on}$  for the wild-type complex was  $0.74 \times 10^4 \pm 0.02 \text{ M}^{-1}\text{s}^{-1}$  while that for the helix truncation was three-fold faster,  $2.38 \times 10^4 \pm 0.04 \text{ M}^{-1}\text{s}^{-1}$ , showing that removing the small helix speeds up TolB binding. **c**, Competition stopped-flow experiments in which FITC-labelled TolB22-33-TolA complexes were chased with a large excess of unlabeled TolB22-33 peptide (3 mM) and monitored by fluorescence anisotropy for wild-type (red) and the helix truncation mutant of TolA (black).  $k_{off}$  for the complex changes minimally as a result of truncating the C-terminus of TolA;  $0.9 \pm 0.1 \text{ s}^{-1}$  for the wild-type complex and  $1.4 \pm 0.1 \text{ s}^{-1}$  for the truncation. **d**, Agar plate assay showing the impact of various TolB mutations on the stability of the *E. coli* outer membrane. Serial dilutions of cell cultures were grown either in the presence (left-hand plate) or absence (right-hand plate) of 2% SDS. Mutant phenotypes were assessed in Keio collection *tolB* deletion mutant background that was complemented with plasmid-expressed *tolB* (*ptolB*). Mutations of the hydrophobic residues at the core of the TolB-TolA complex (TolB Ile25, Val26 or Ile27) produce *tol* phenotypes when substituted for alanine either individually or in combination. The equivalent residues in the *P. aeruginosa* complex are Leu25, Val26 and Ile27. **e**, Fluorescence anisotropy competition assay showing that alanine mutations of hydrophobic TolA binding residues in *P. aeruginosa* TolB, Leu25 and Ile27, completely inhibit binding of TolB to TolA. FITC-labelled TolB22-33 peptide (1 μM) was first bound to the C-terminal domain of TolA (2 mM) to which was added increasing concentrations of unlabelled competitor peptide and the decrease in anisotropy monitored for the wild-type complex (closed spheres), a TolB L25A mutant peptide (closed triangles) and a TolB L25A I27A double mutant peptide (open spheres). Data points were obtained in triplicate. **f**, 3D-Structured illumination microscopy (SIM) data showing that abolition of the TolB-TolA interaction does not affect TolA's recruitment to the divisome. TolA-GFP (plasmid expressed as described in 32) was imaged in *E. coli* cells in either a wild-type TolB background, left-hand cell, or a TolB L25A I27A double mutant, right-hand cell, both expressed from a plasmid. Scale bar, 1 μm. Graphical displays beneath the cells show normalized fluorescence distribution on the left-hand panel and the ring diameter of TolA-GFP at the divisome in the right hand panel. Both representations confirm that mutation of N-terminal TolB residues have no impact on divisome recruitment of TolA and by inference TolQ and TolR. Mann-Whitney U test and student t test (for intensity distributions and diameter sizes, respectively) show no significant difference between the two conditions. A total of 30 cells were analysed per condition from three independent experiments. See 32 for details of the microscopy and the data analyses.

# Figure supplemental 8

bioRxiv preprint doi: <https://doi.org/10.1101/794551>; this version posted October 4, 2019. The copyright holder for this preprint (which was not certified by peer review) is the author/funder, who has granted bioRxiv a license to display the preprint in perpetuity. It is made available under aCC-BY 4.0 International license.

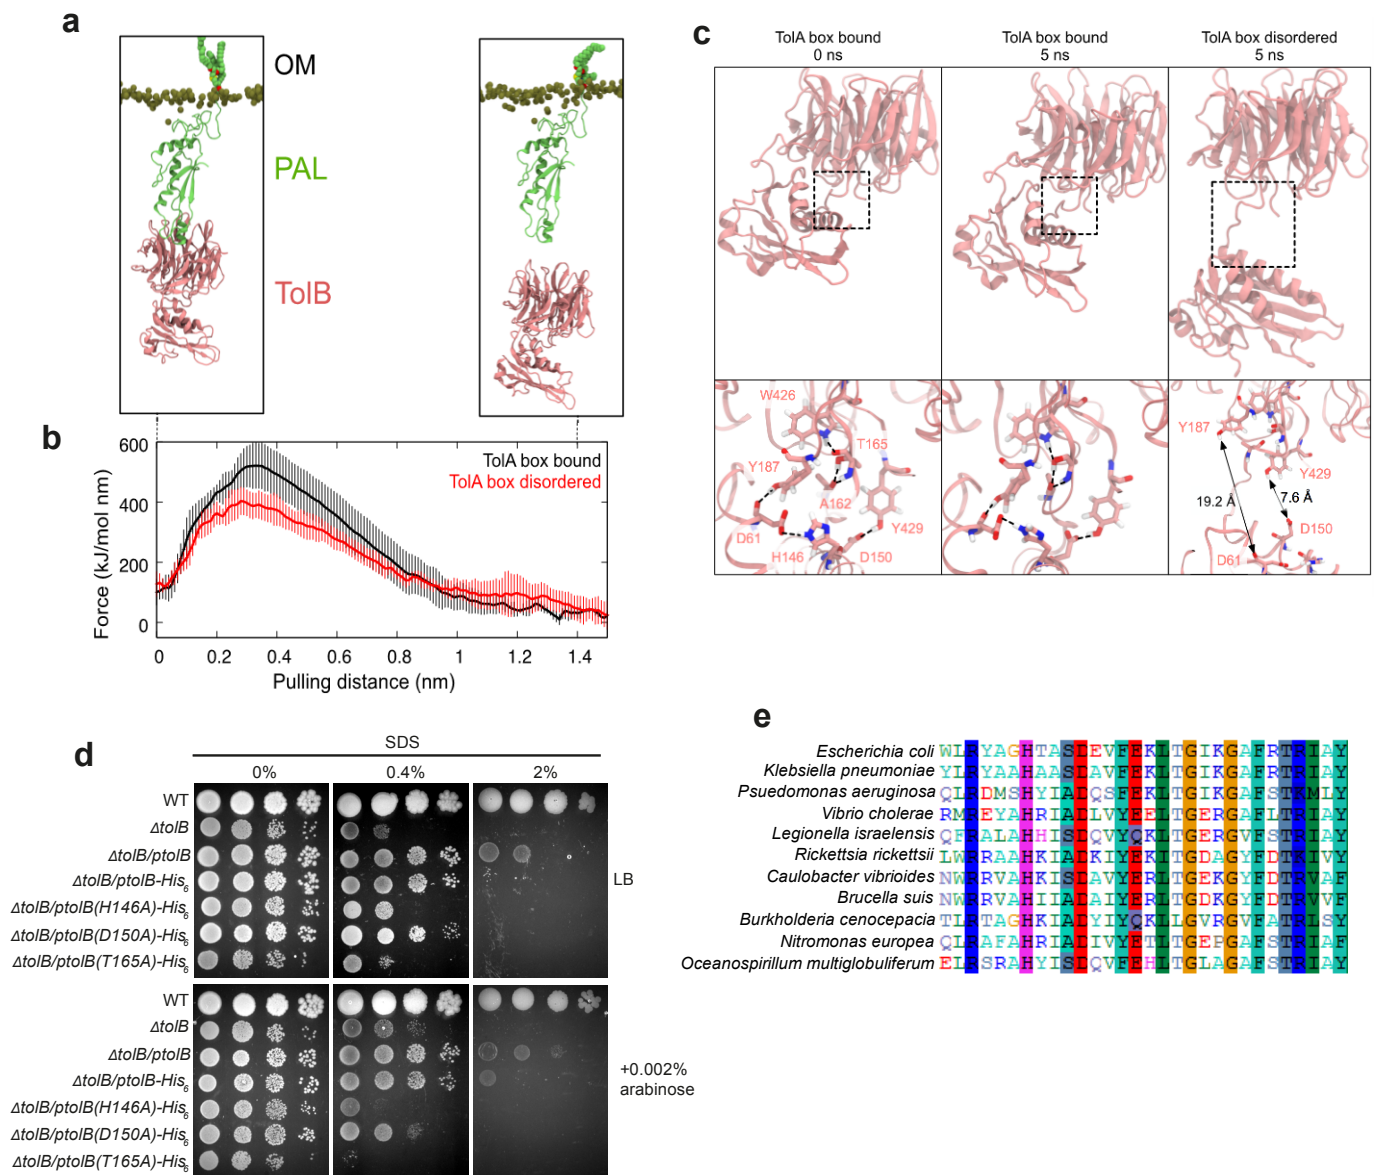

**Supplementary Figure 8. Steered molecular dynamics simulations suggest interdomain TolB residues mediate force-dependent dissociation of the TolB-Pal complex.** **a**, Pal-bound TolB (PDB: 2W8B)<sup>18</sup> was pulled along the z-axis (perpendicular to the plane of the membrane) until it dissociated from Pal. The two images represent the start and end points of one simulation. Two conformations of TolB were used in the simulations: the TolA binding region sequestered between TolB's two domains (as in PDB: 2W8B), and the TolA binding region in a disordered state. The pulling force required to detach TolB from Pal in the former conformation was higher than that in the latter conformation. **b**, Average pulling force from five independent simulations of the TolB-Pal complex in which the TolB box was ordered (black) or disordered (red). Error bars indicate the standard deviations. Greater force is needed to dissociate TolB from Pal when its TolA binding region is bound between the two domains of TolB. **c**, *Left*, snapshot of TolB at the beginning of one of the TolA box bound simulations. The region shown in dotted square is enlarged beneath the panel. Residues involved in interdomain hydrogen bonds are highlighted and indicated by dotted lines. *Middle*, snapshot at the end of the simulation whereby all the hydrogen bonds were preserved. *Right*, snapshot at the end of one of the simulations where the starting position of the TolA binding region was disordered. Simulated pulling caused the N-terminal domain and the propeller domain to detach from each other. Distances between two pairs of residues that formed hydrogen bonds at the beginning of the simulation are shown. **d**, Steered MD simulations identified several inter-domain residues in TolB as potentially mediating force-dependent dissociation from Pal. In particular His146, Asp150 and Thr165. All three residues were mutated individually and expressed off a plasmid in an *E. coli* *tolB* deletion mutant from an arabinose inducible promoter either in the absence (*left*) or presence of 0.4 or 2% SDS (*right*) and with or without induction with arabinose. Plasmid expressed *tolB* complements the deletion background sufficiently to observe that all three mutations yield *tol* phenotypes. **e**, Clustal W alignment of TolB sequences from Gram-negative bacteria highlighting the conservation of inter-domain residues in  $\alpha$ -,  $\beta$ - and  $\gamma$ -proteobacteria.
